# Supplementary figures and images for: Contralateral breast cancer can represent a metastatic spread of the first primary tumor: determination of clonal relationship between contralateral breast cancers using next-generation whole genome sequencing
Source: Springer Nature journal article supplement (doi:10.1186/s13058-015-0608-x), 2015-08-04

# P1

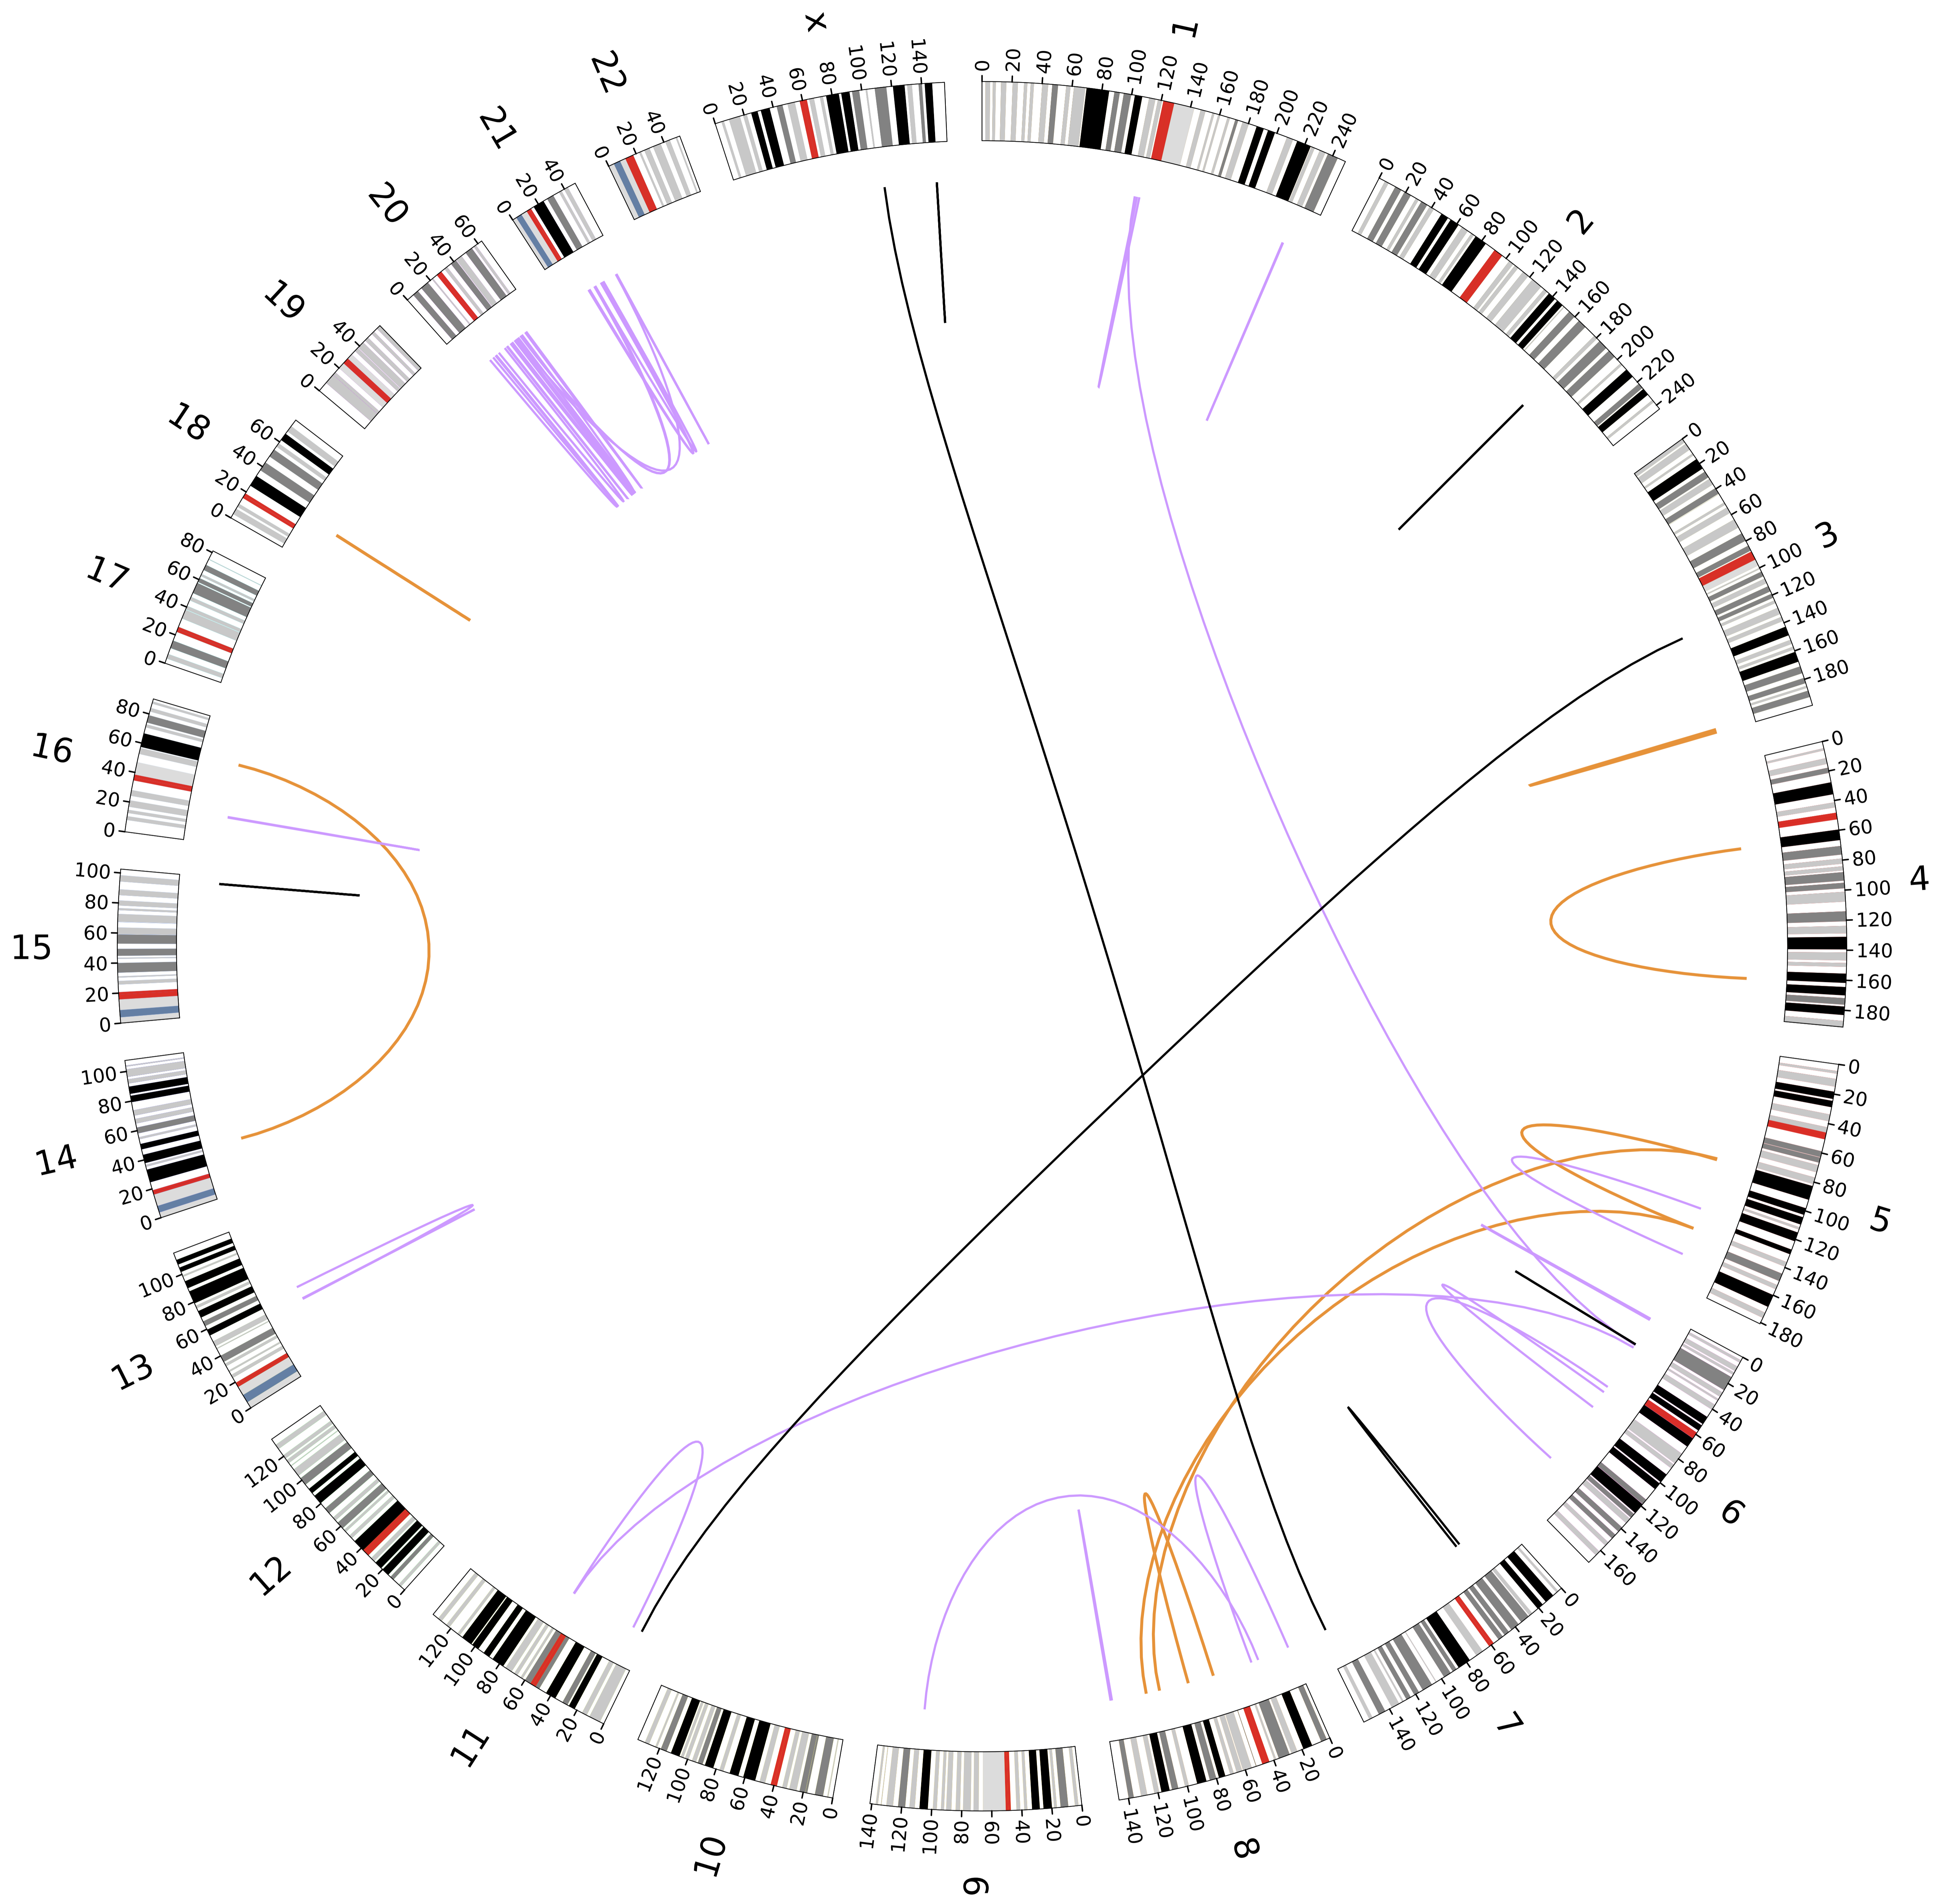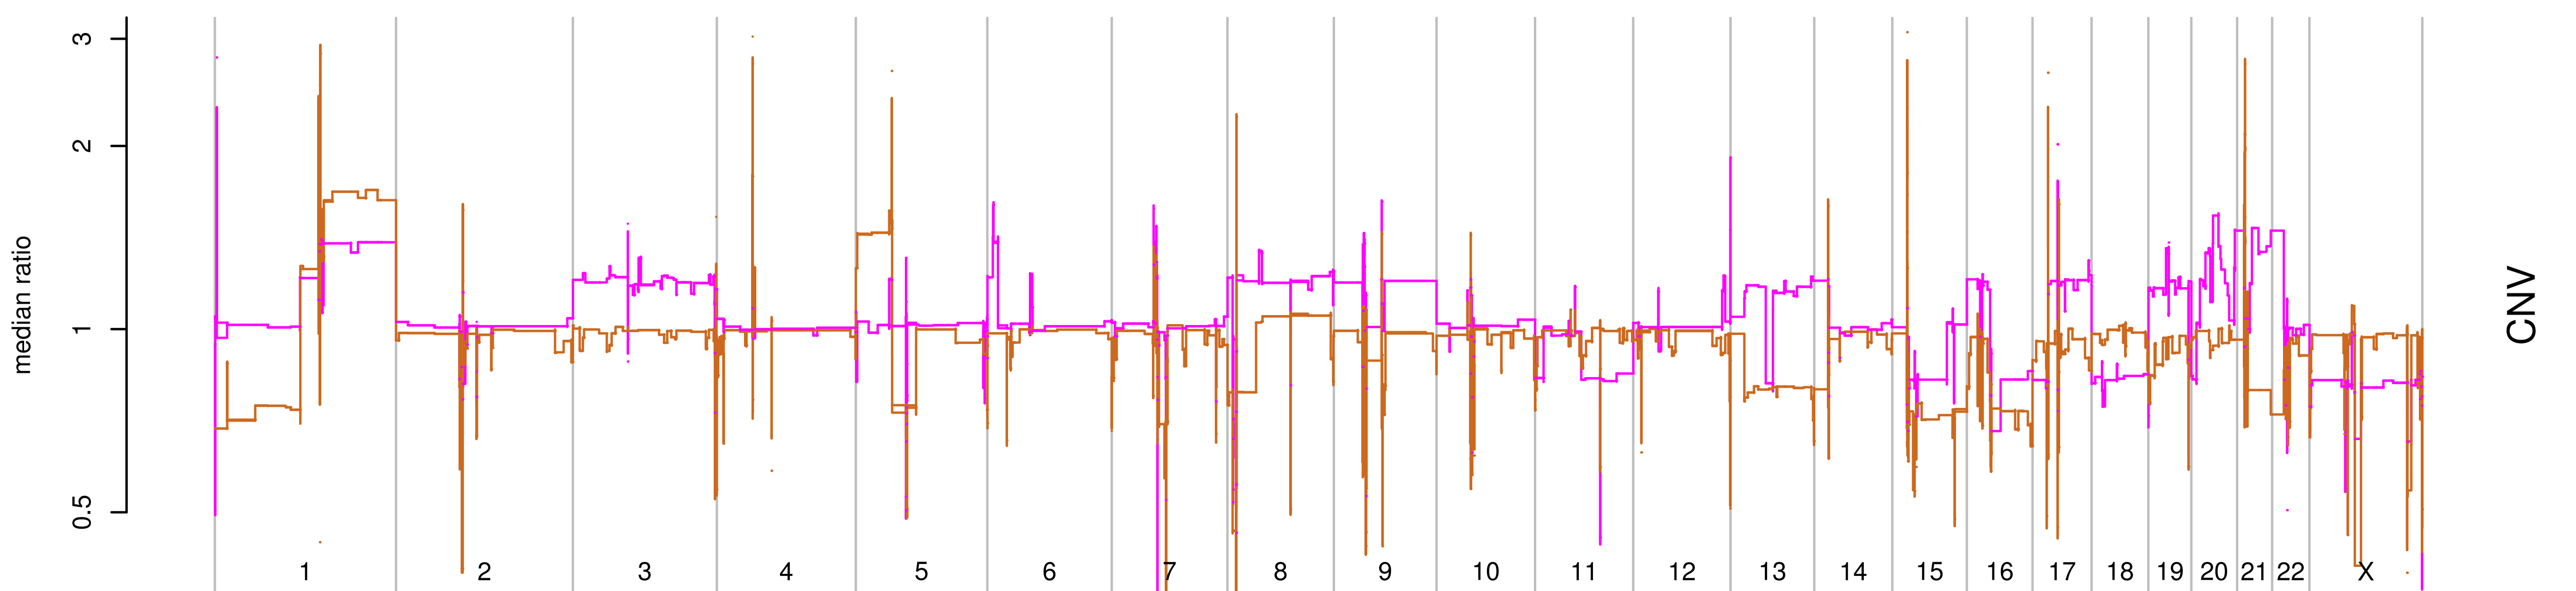



# P2

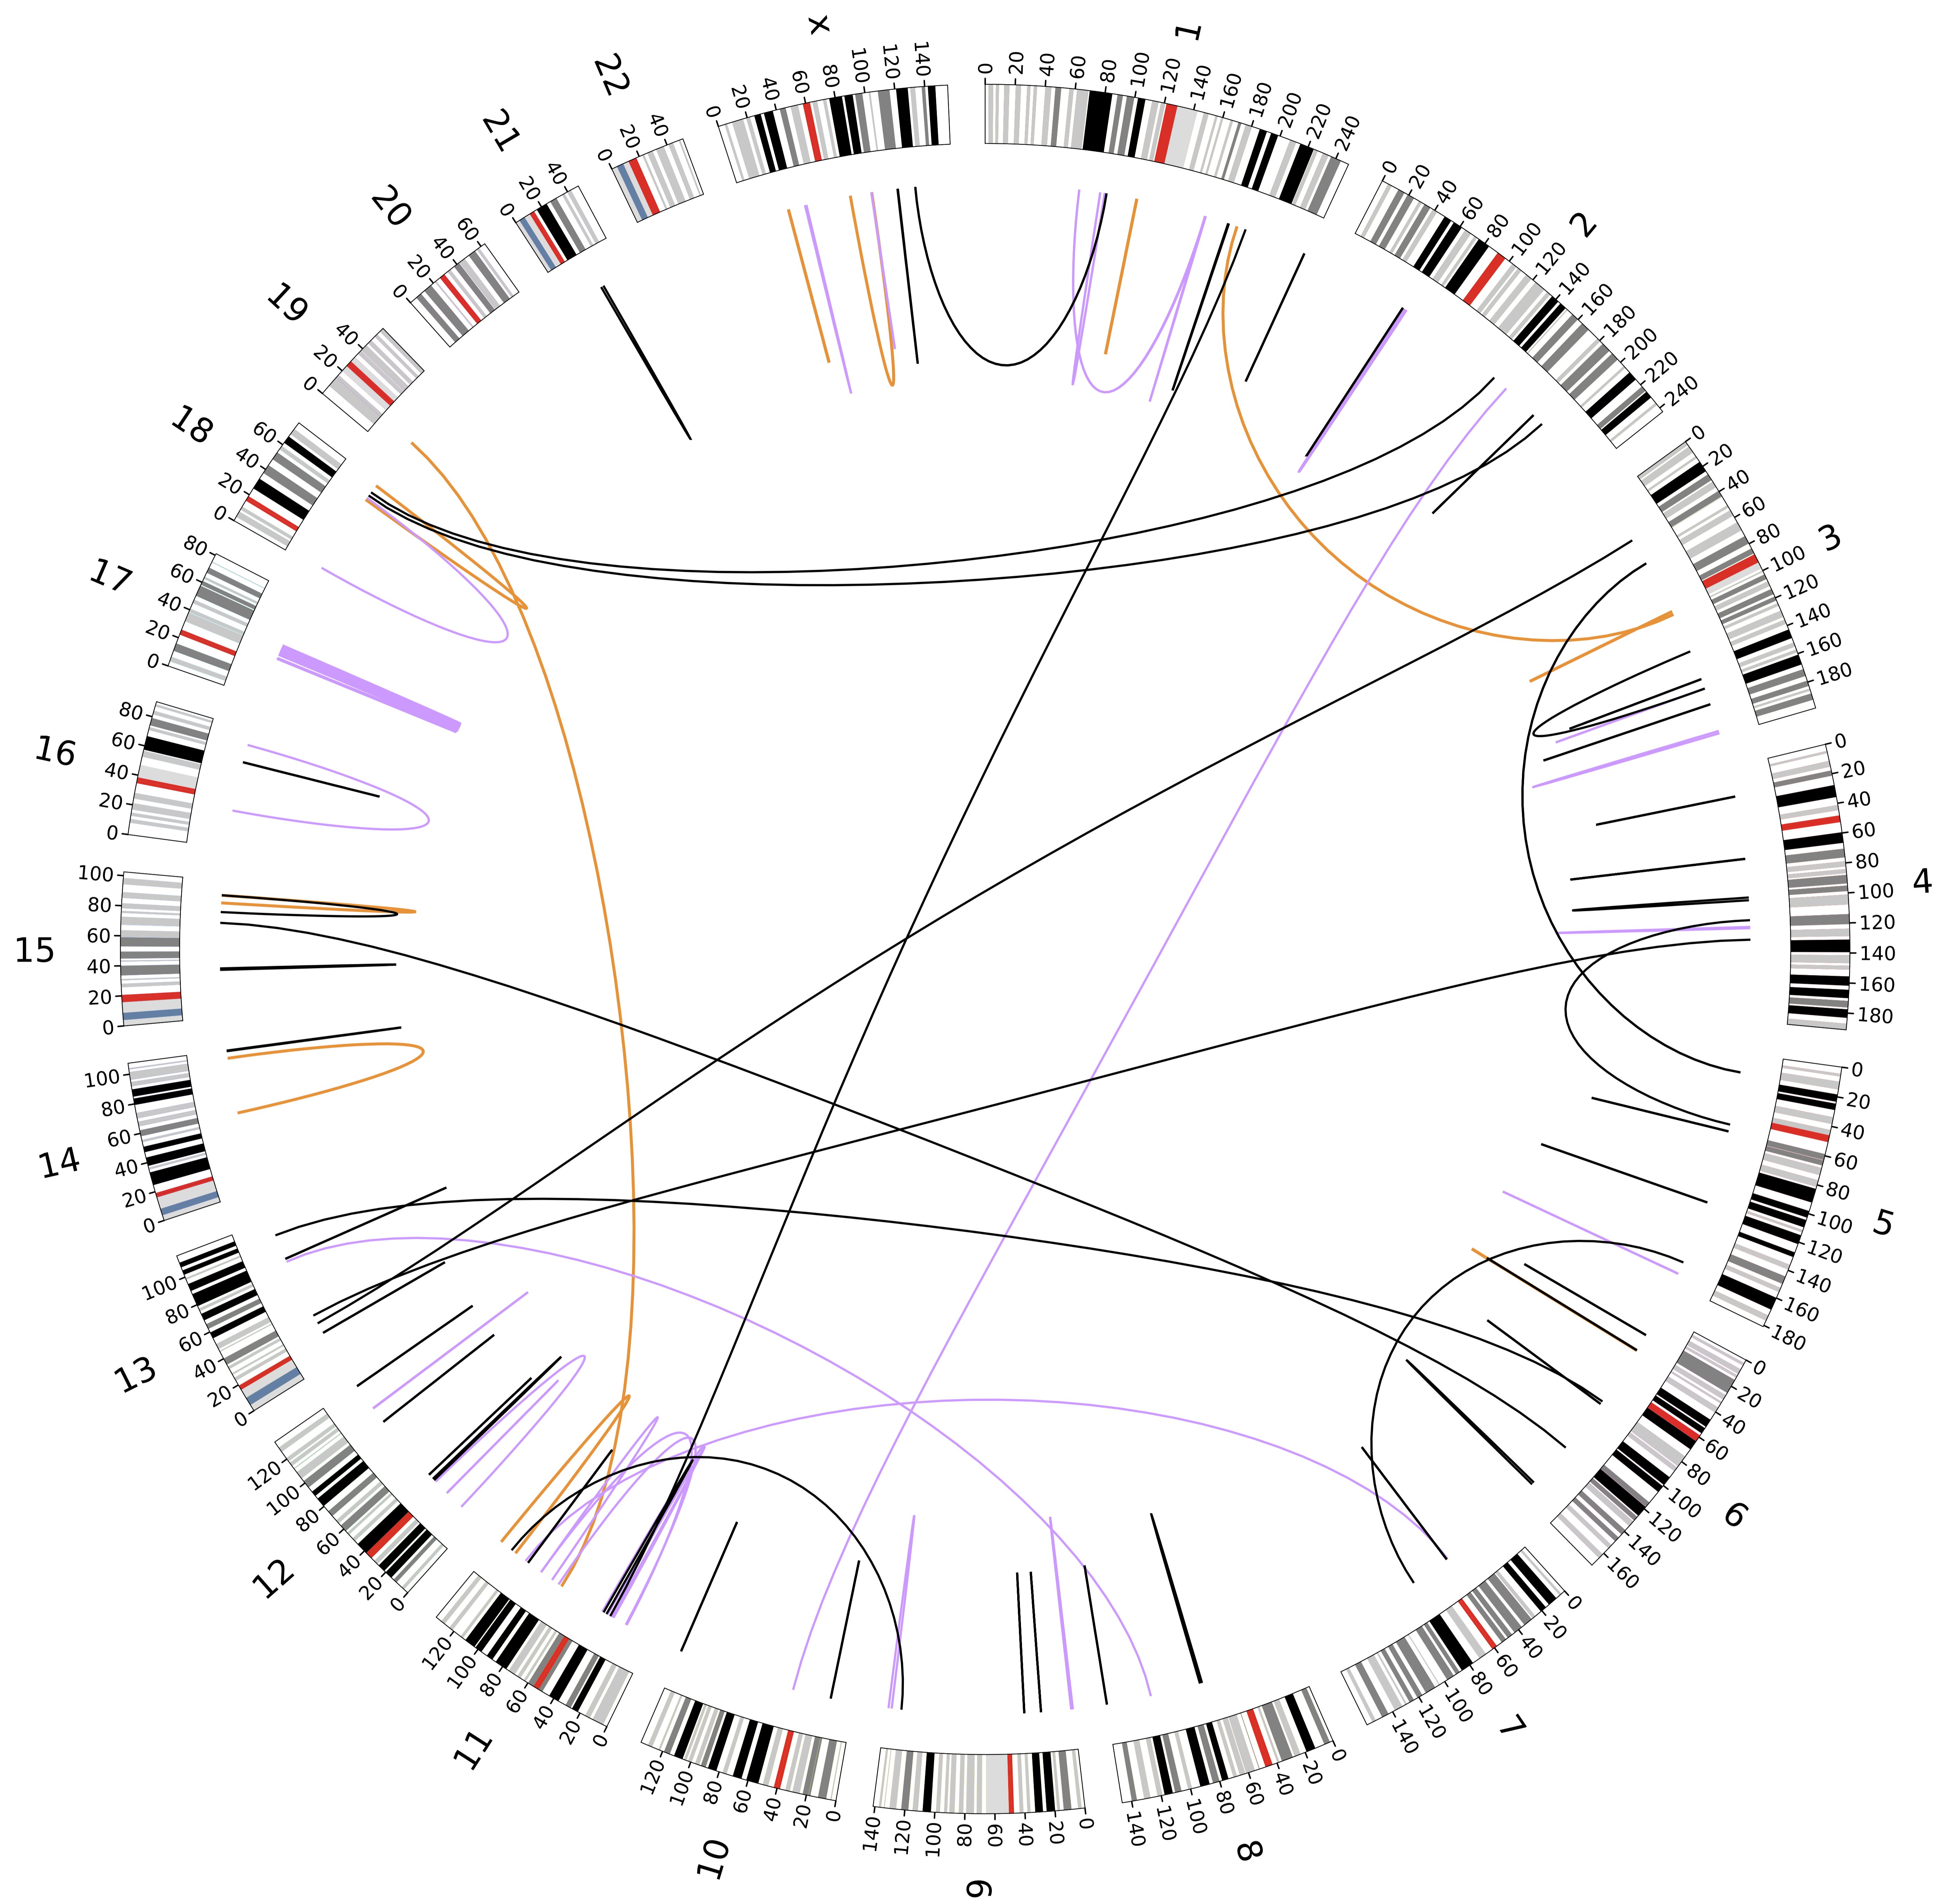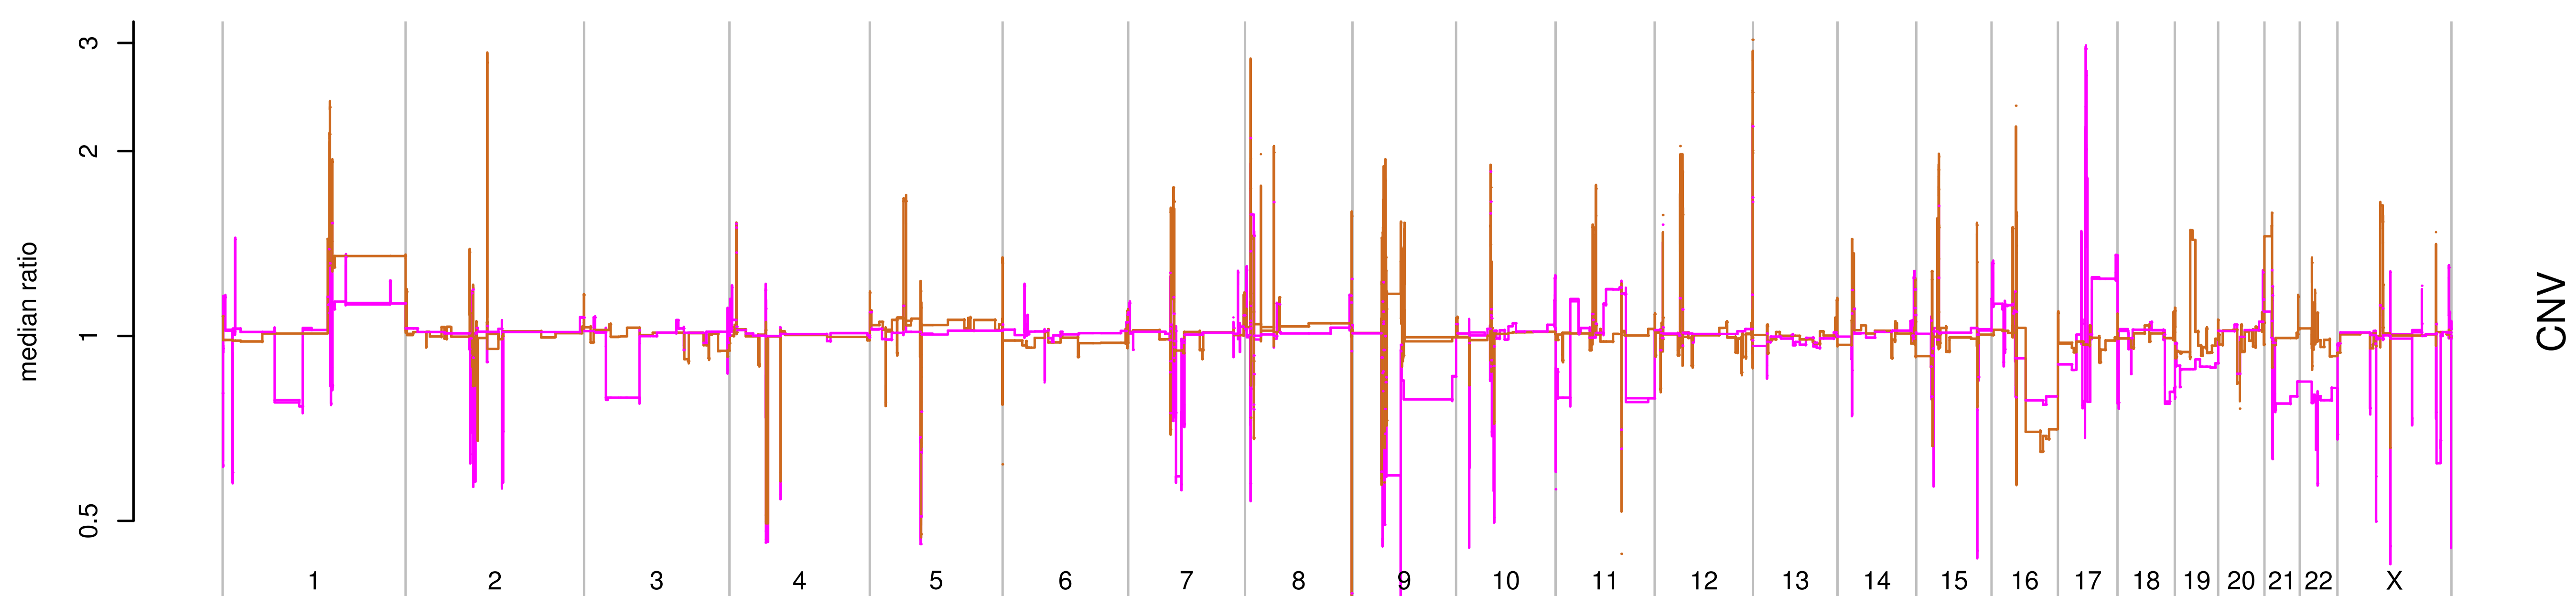



# P3

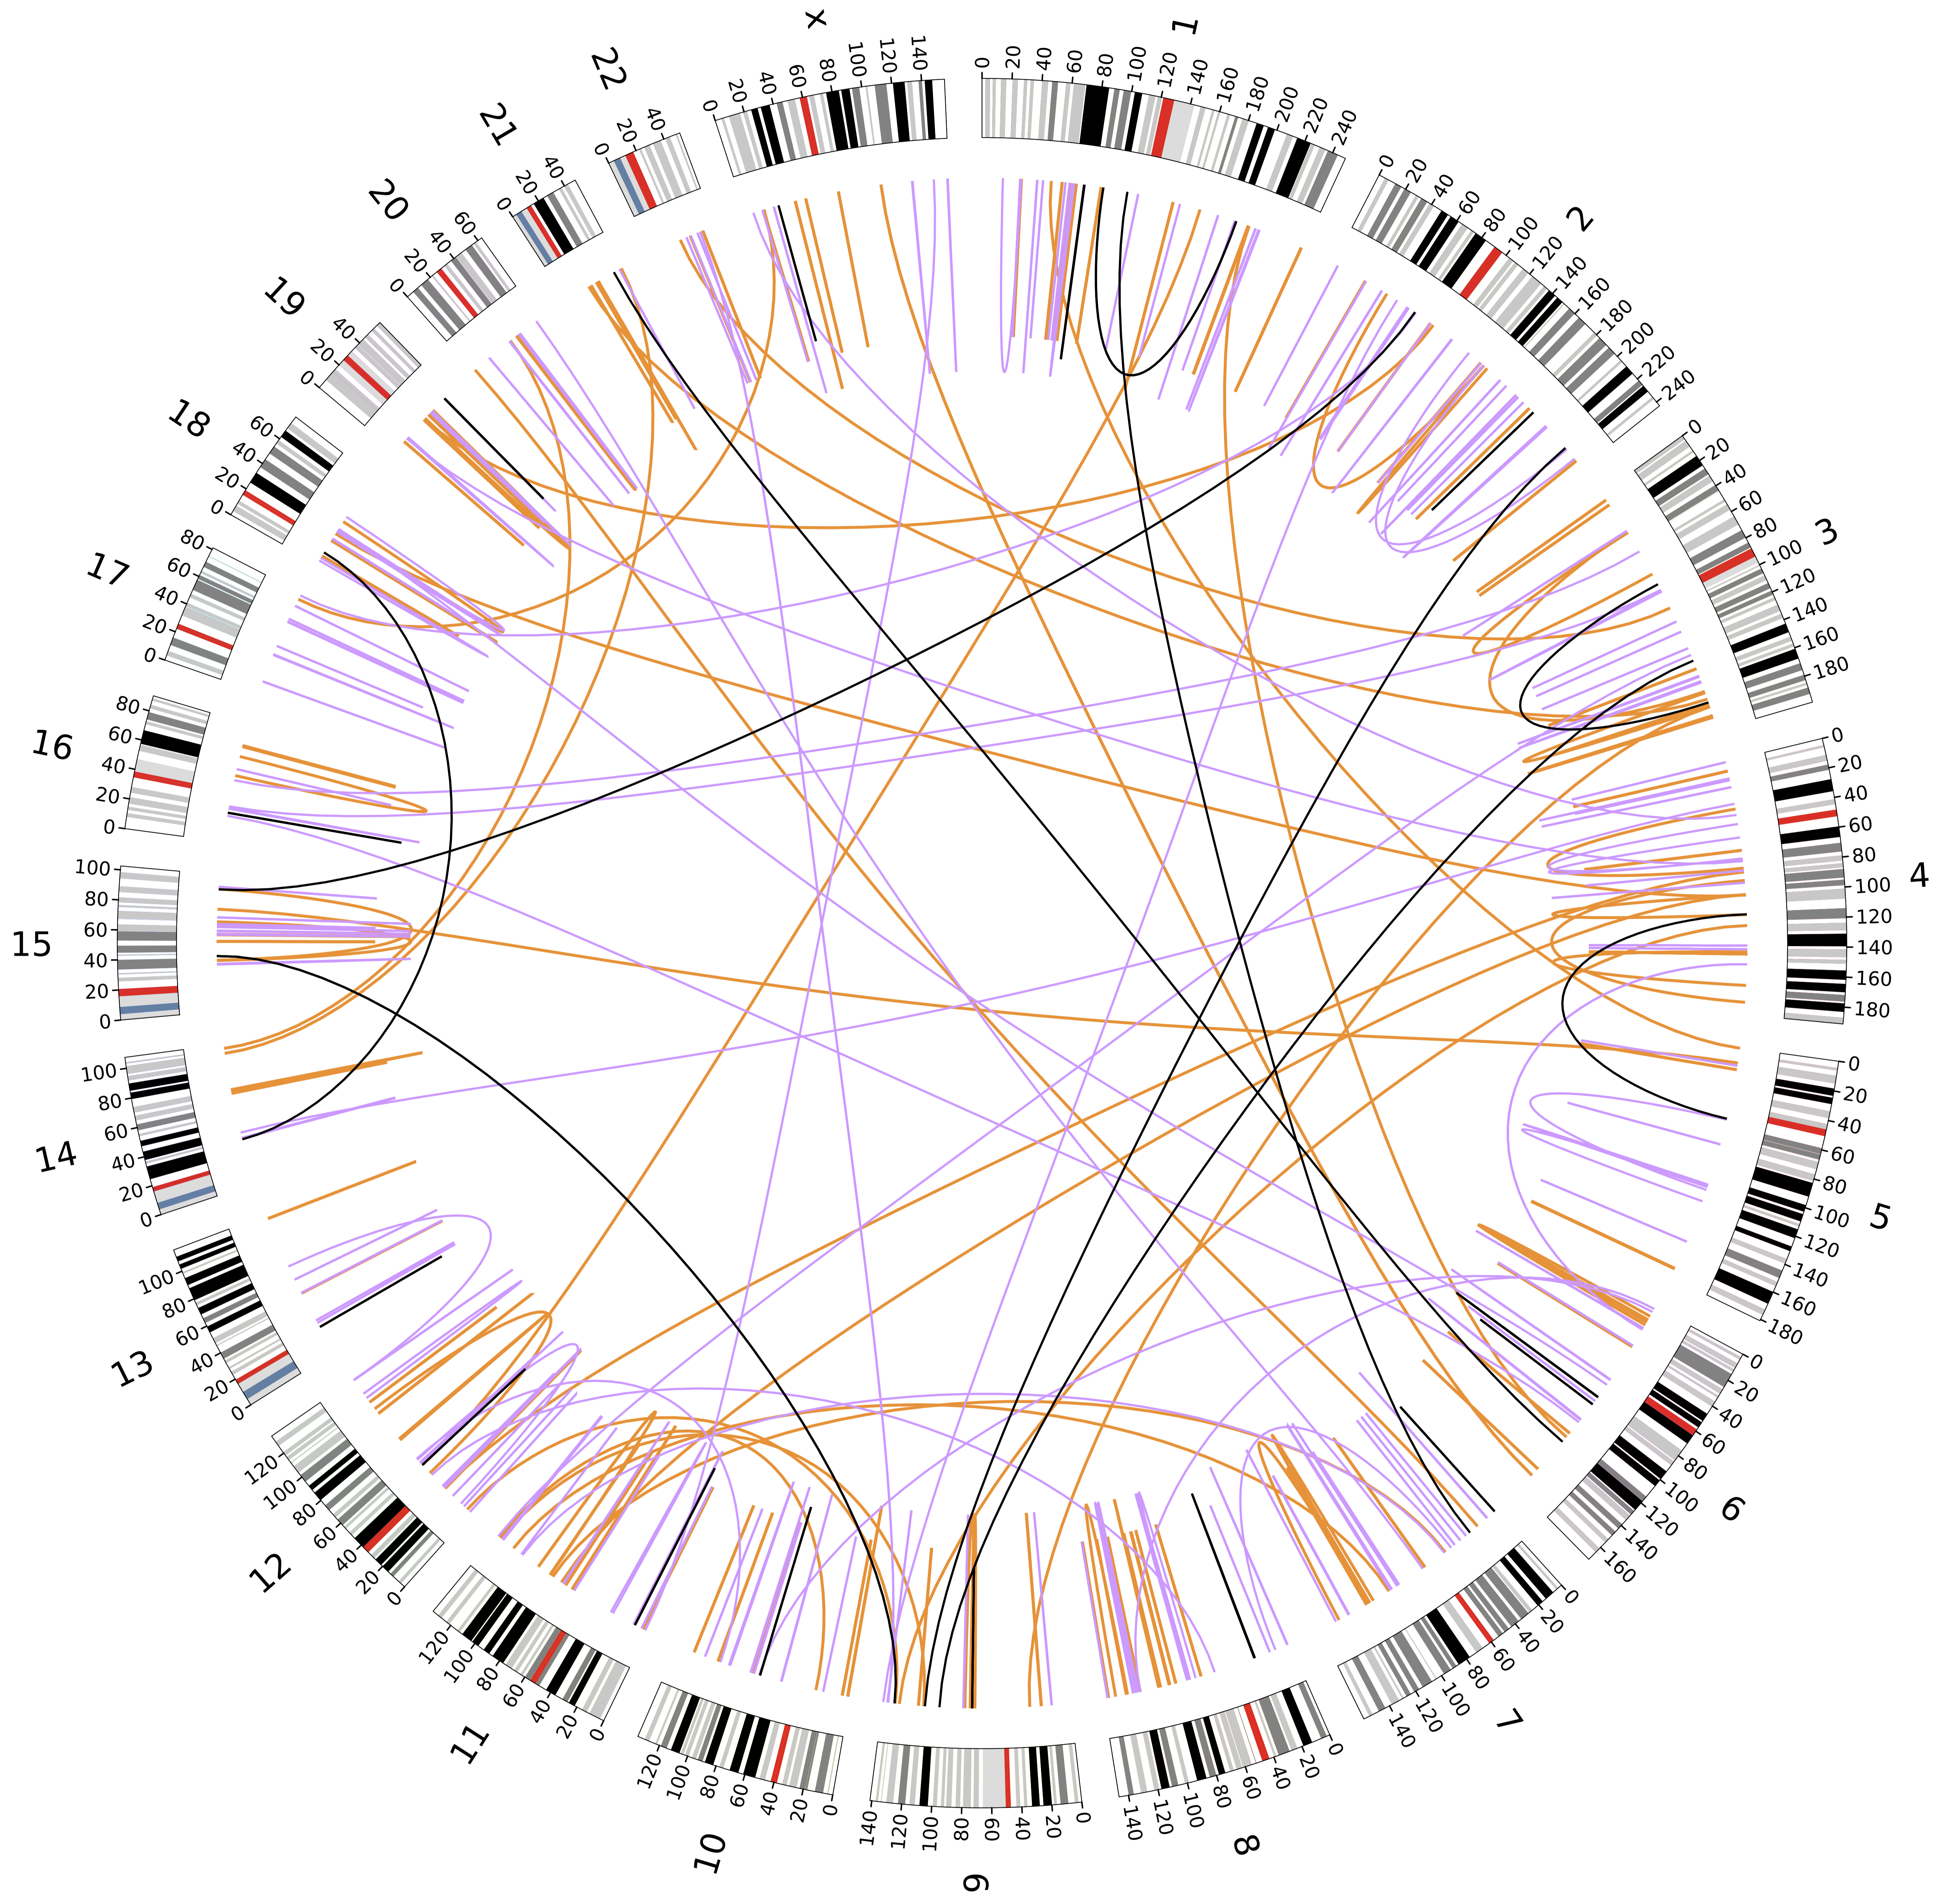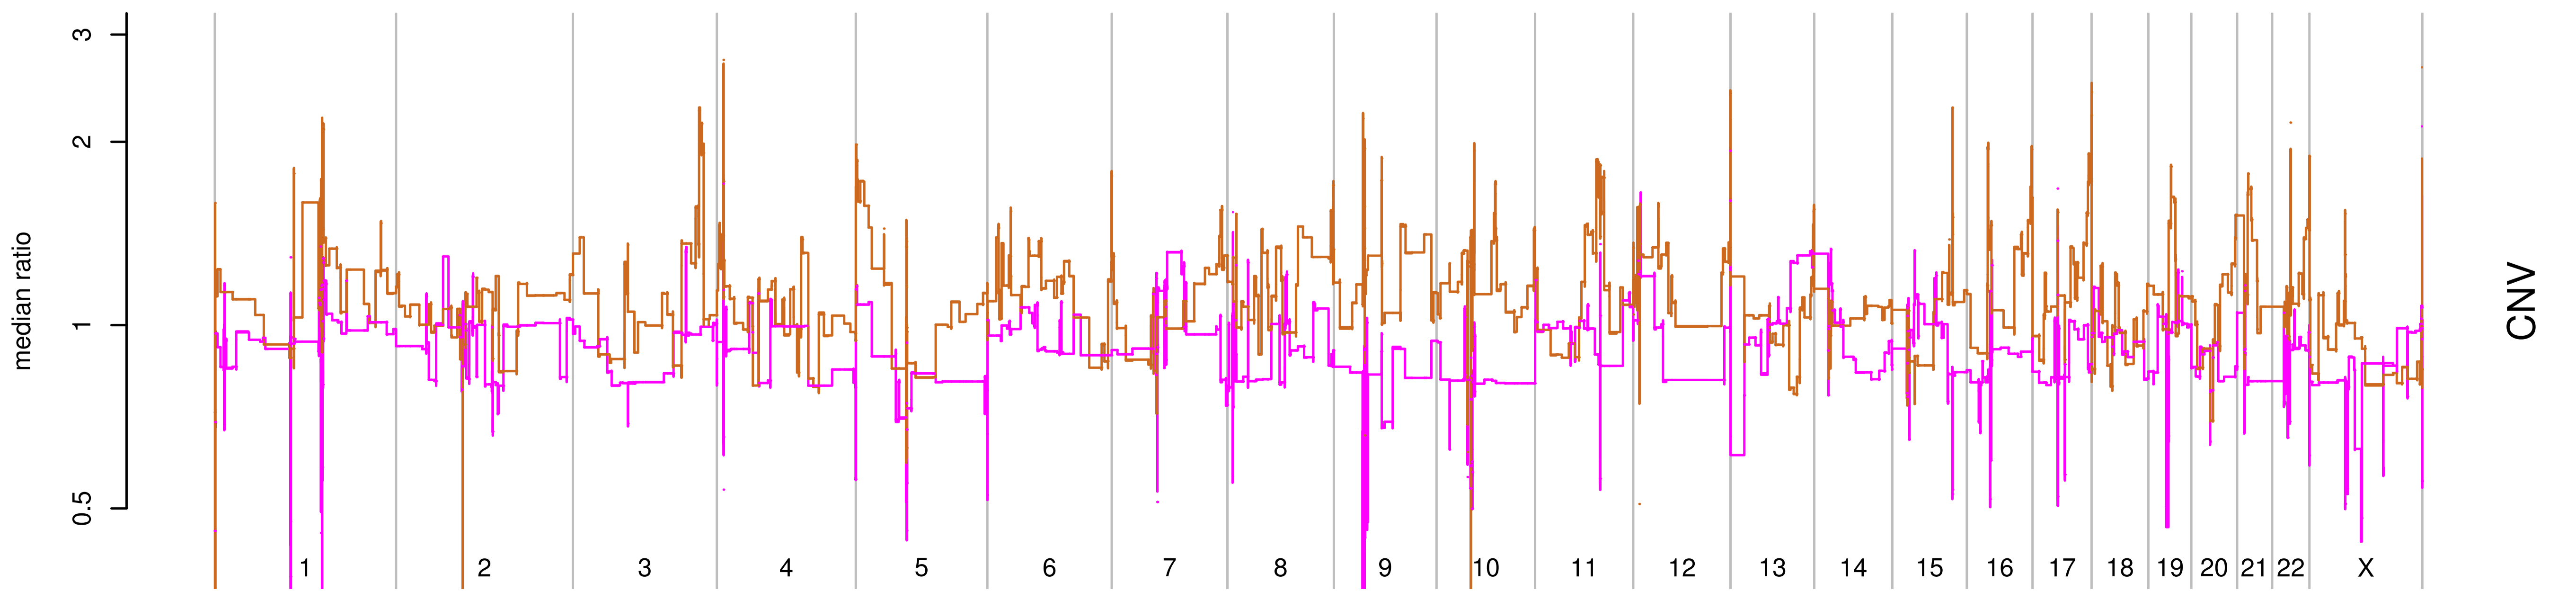



# P4

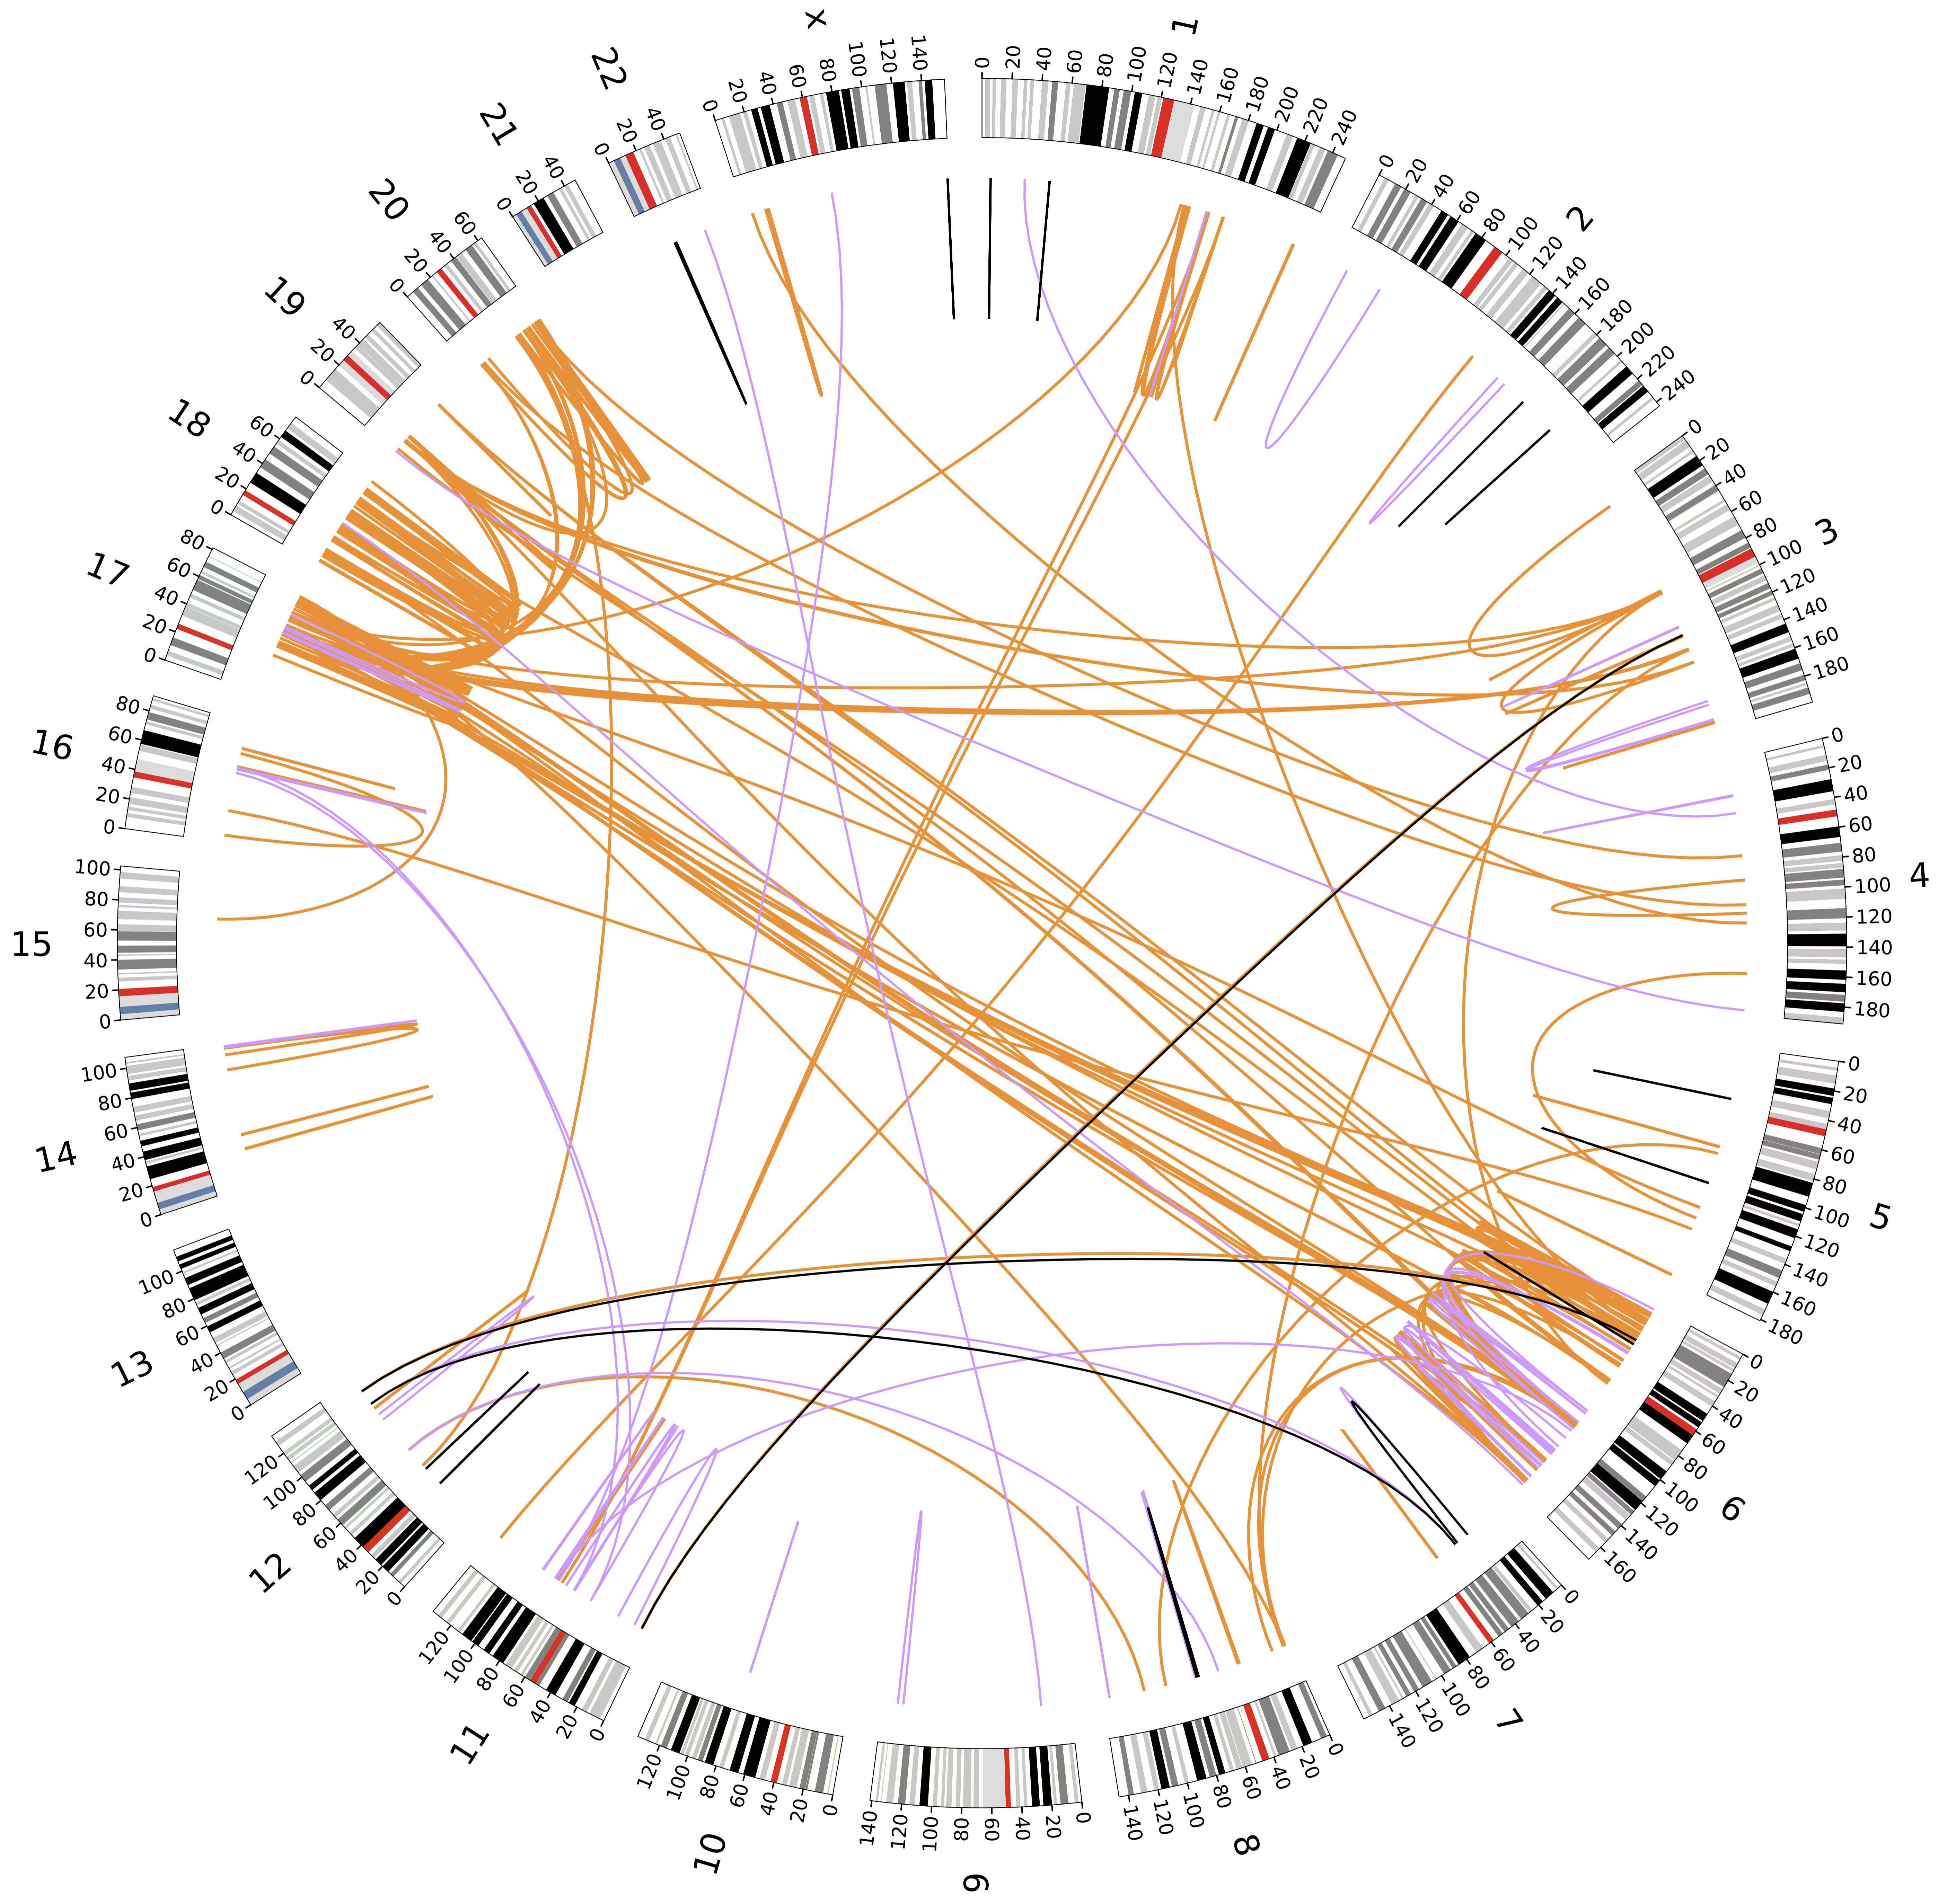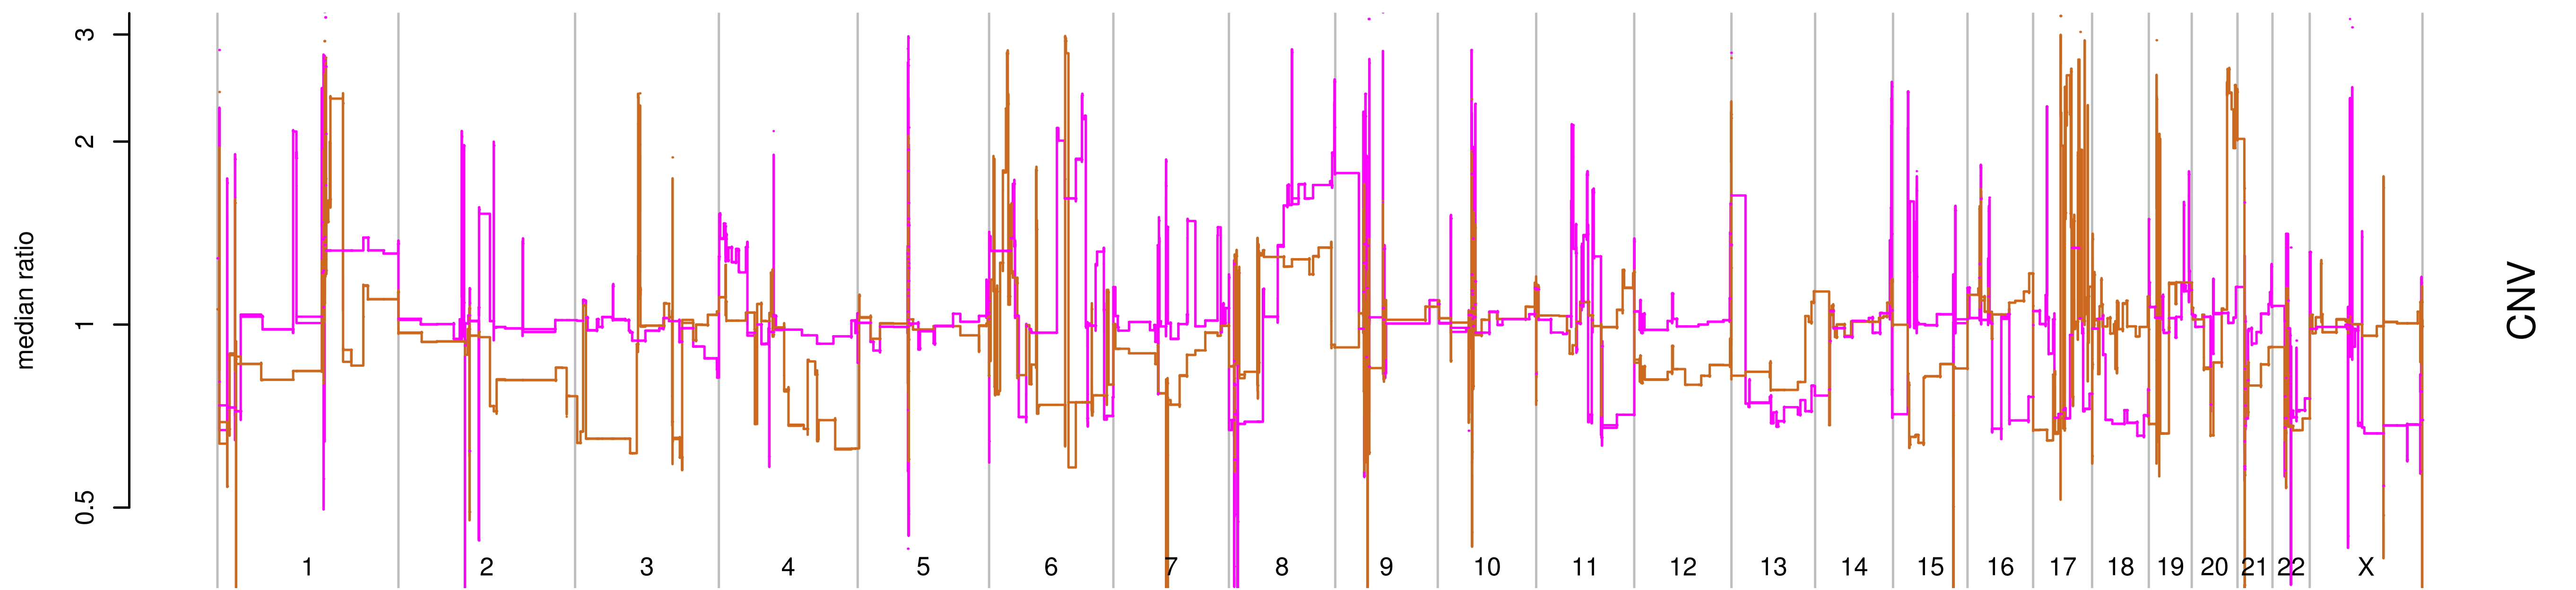



# P5

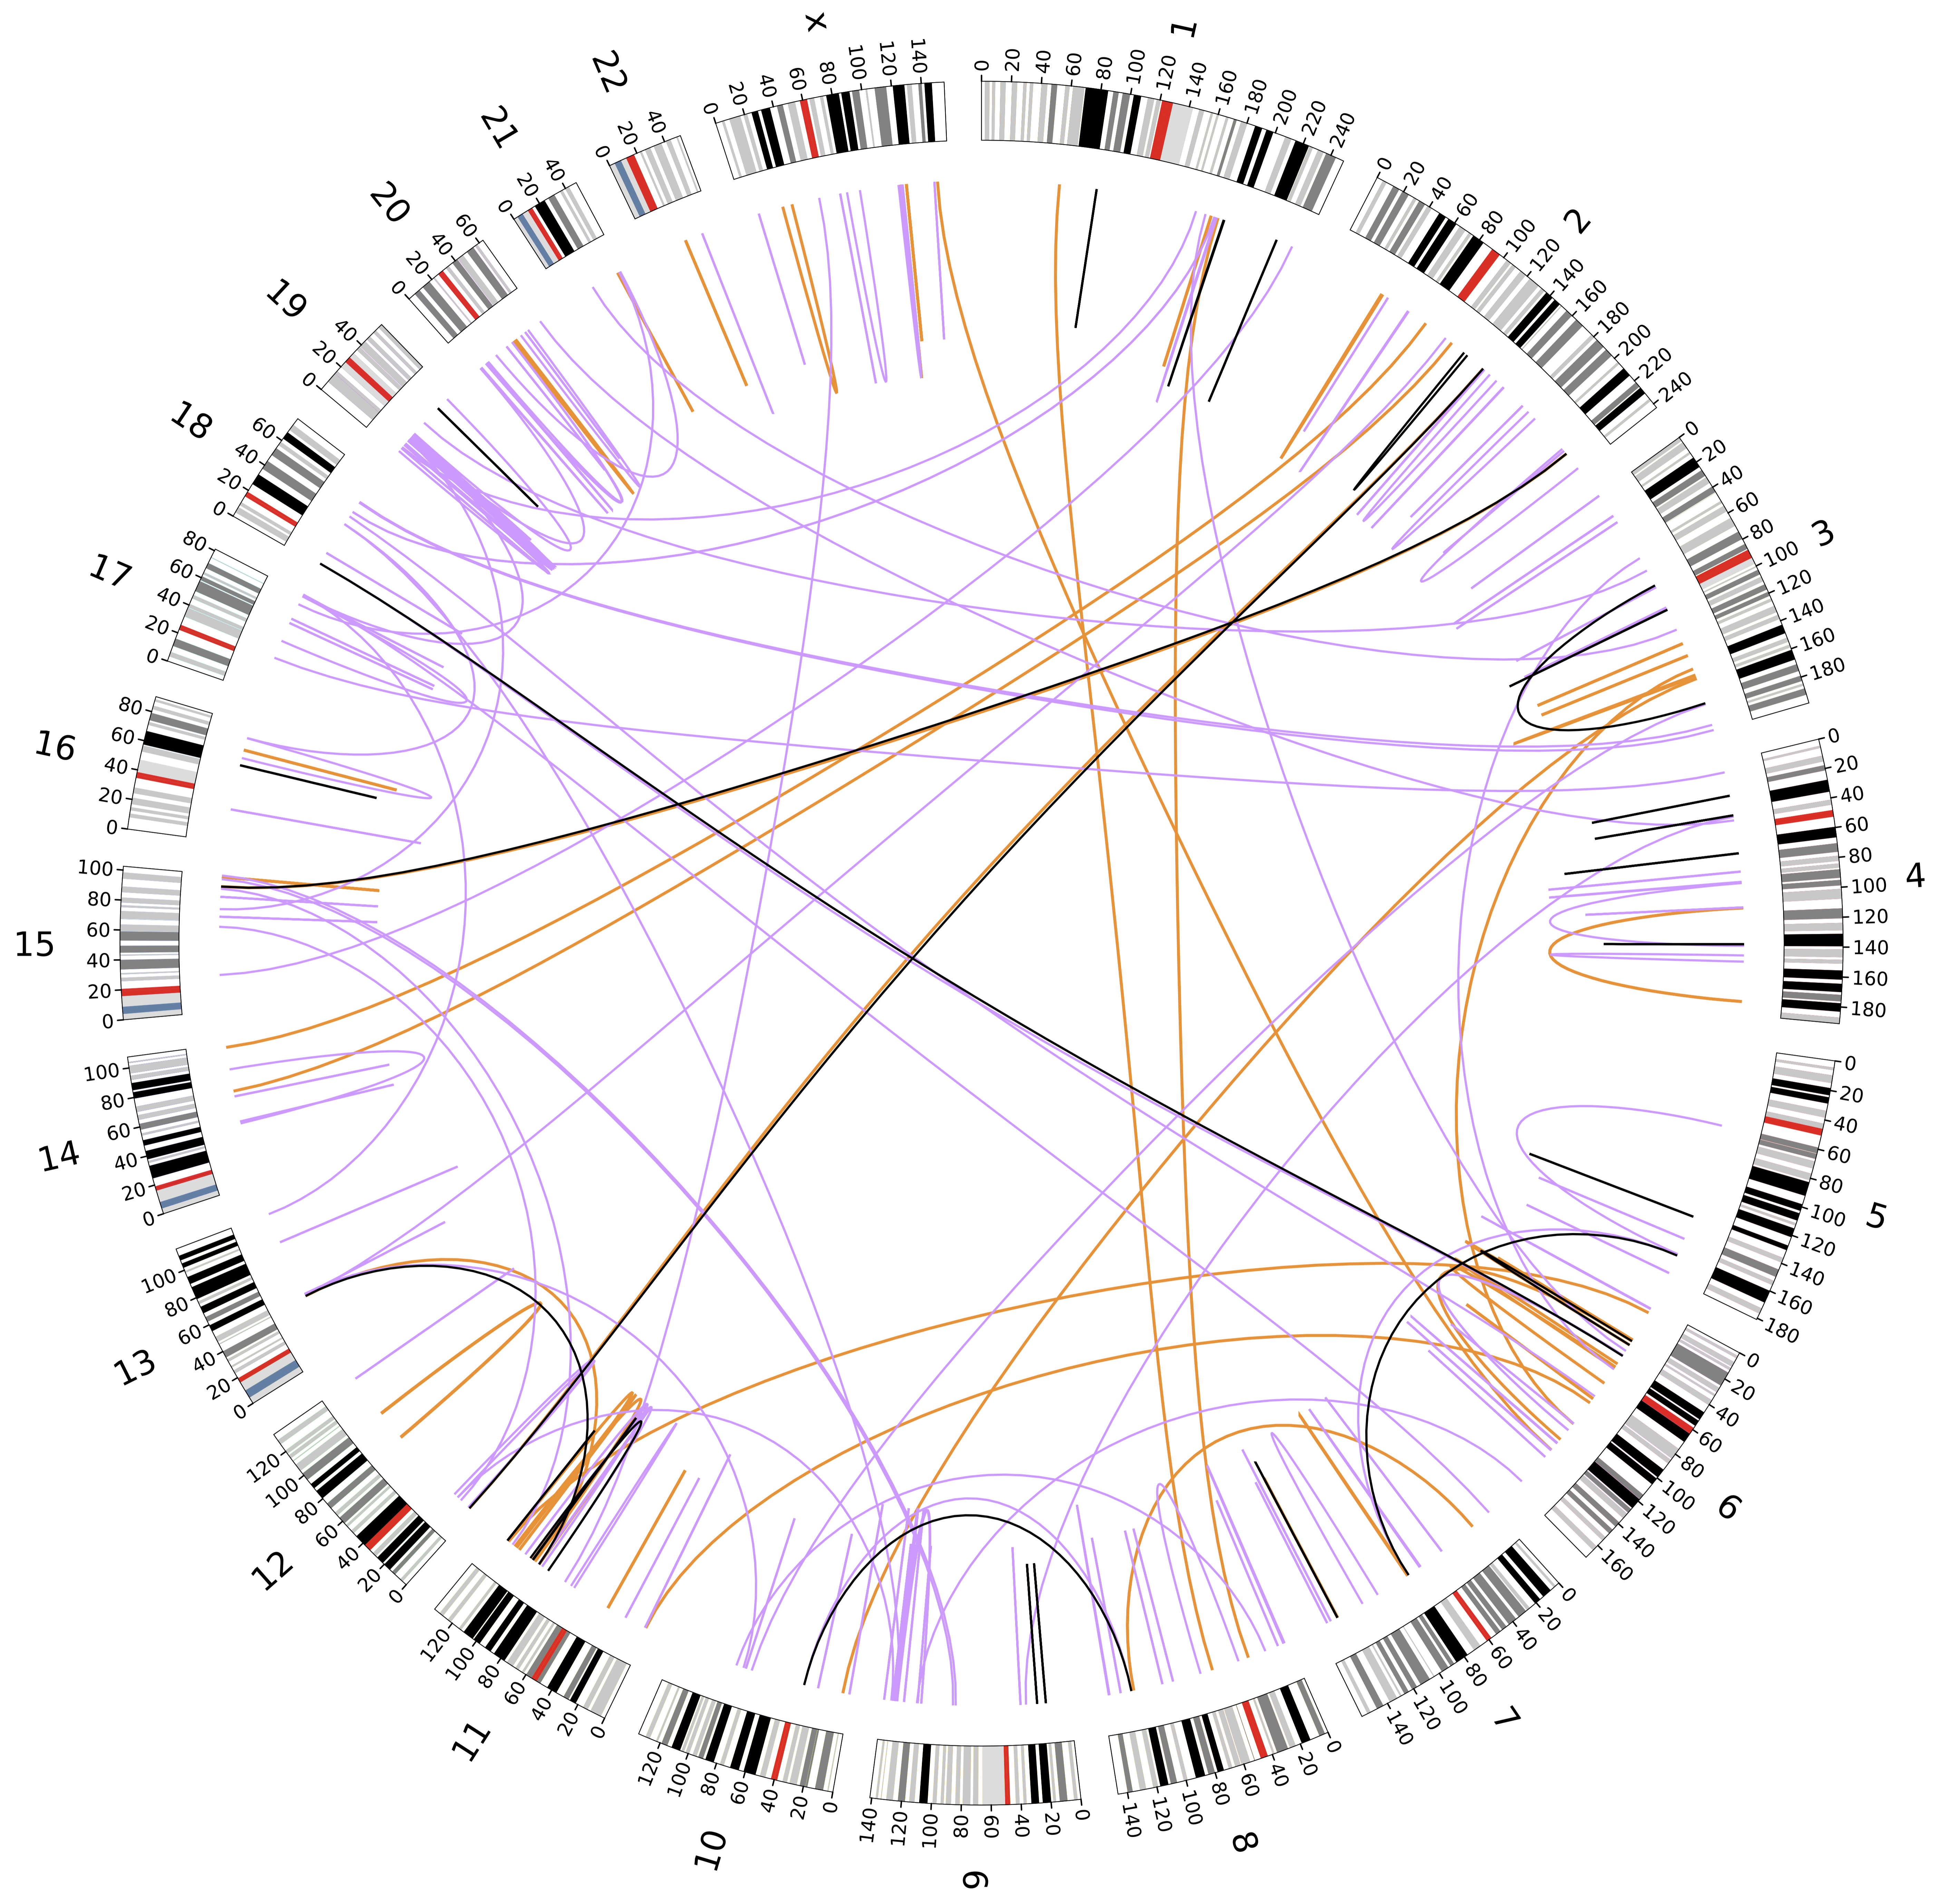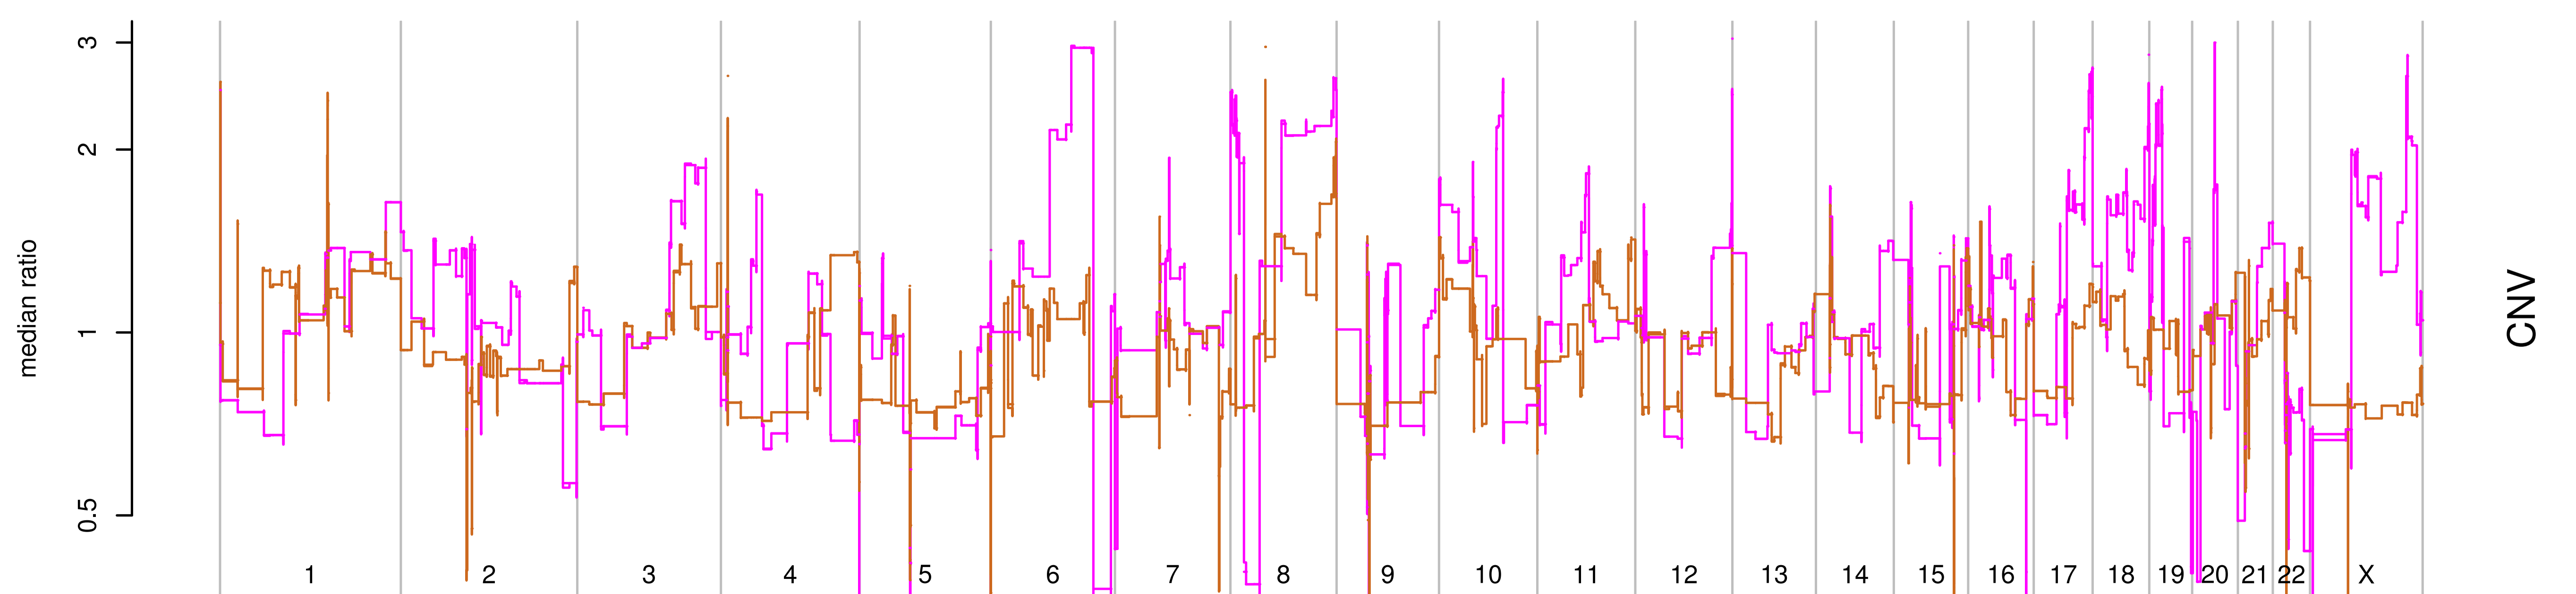



# P6

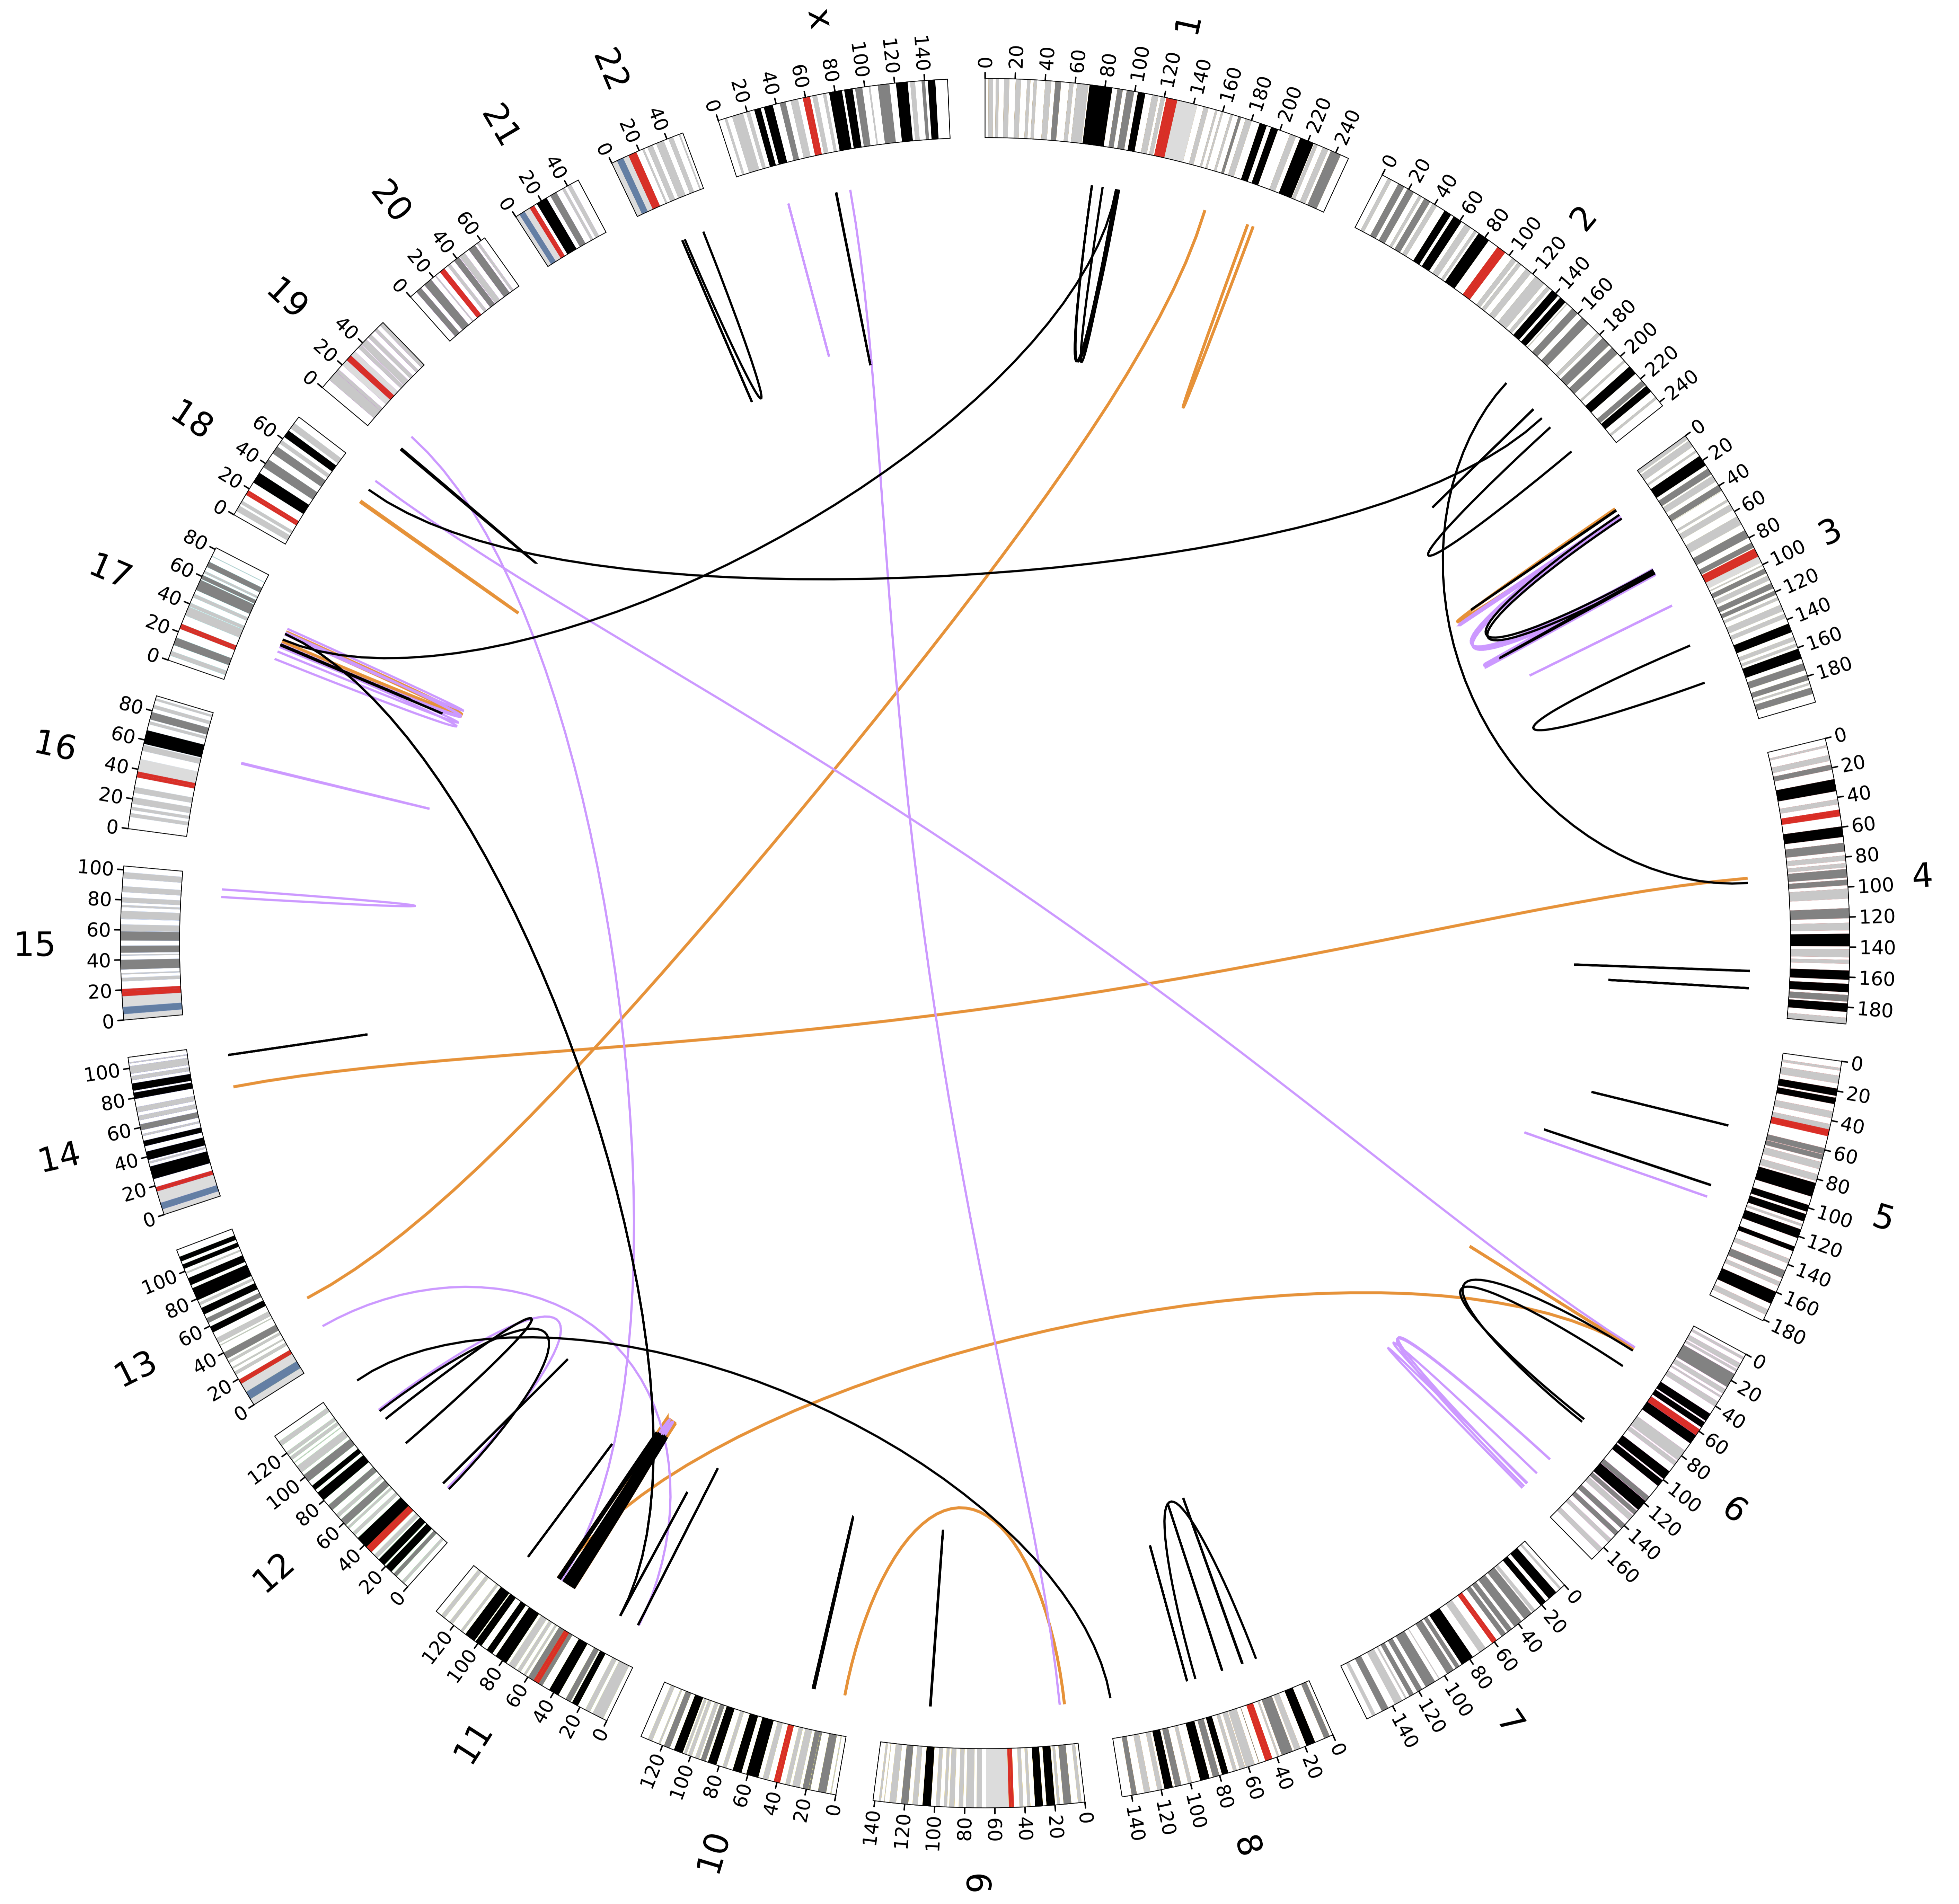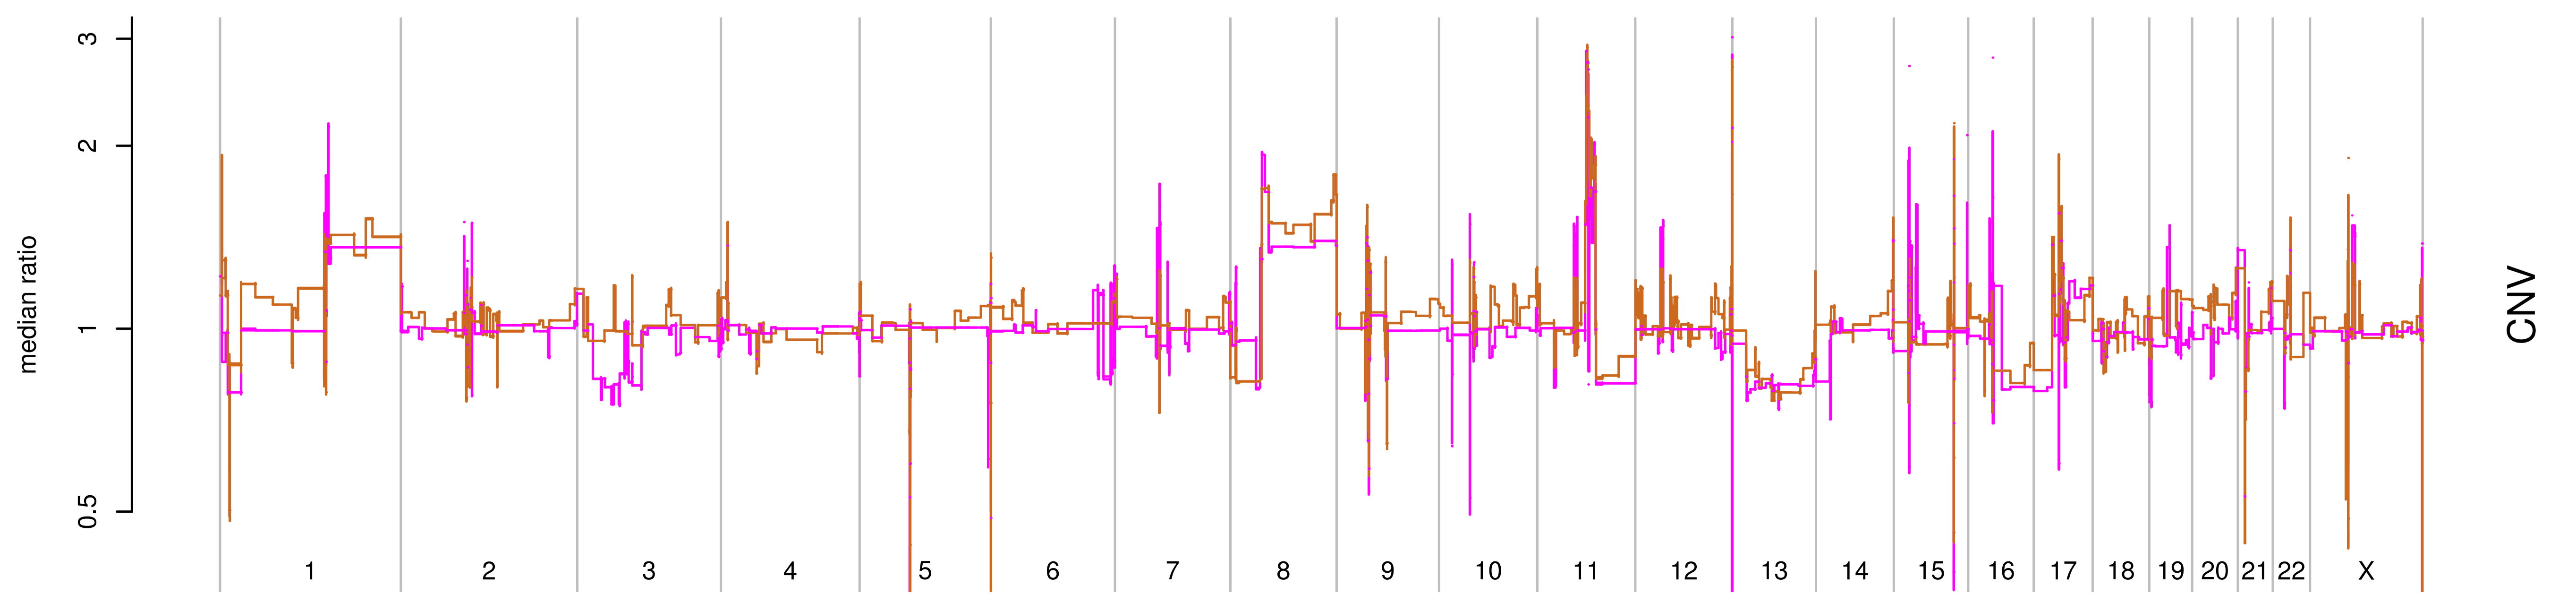



# P7

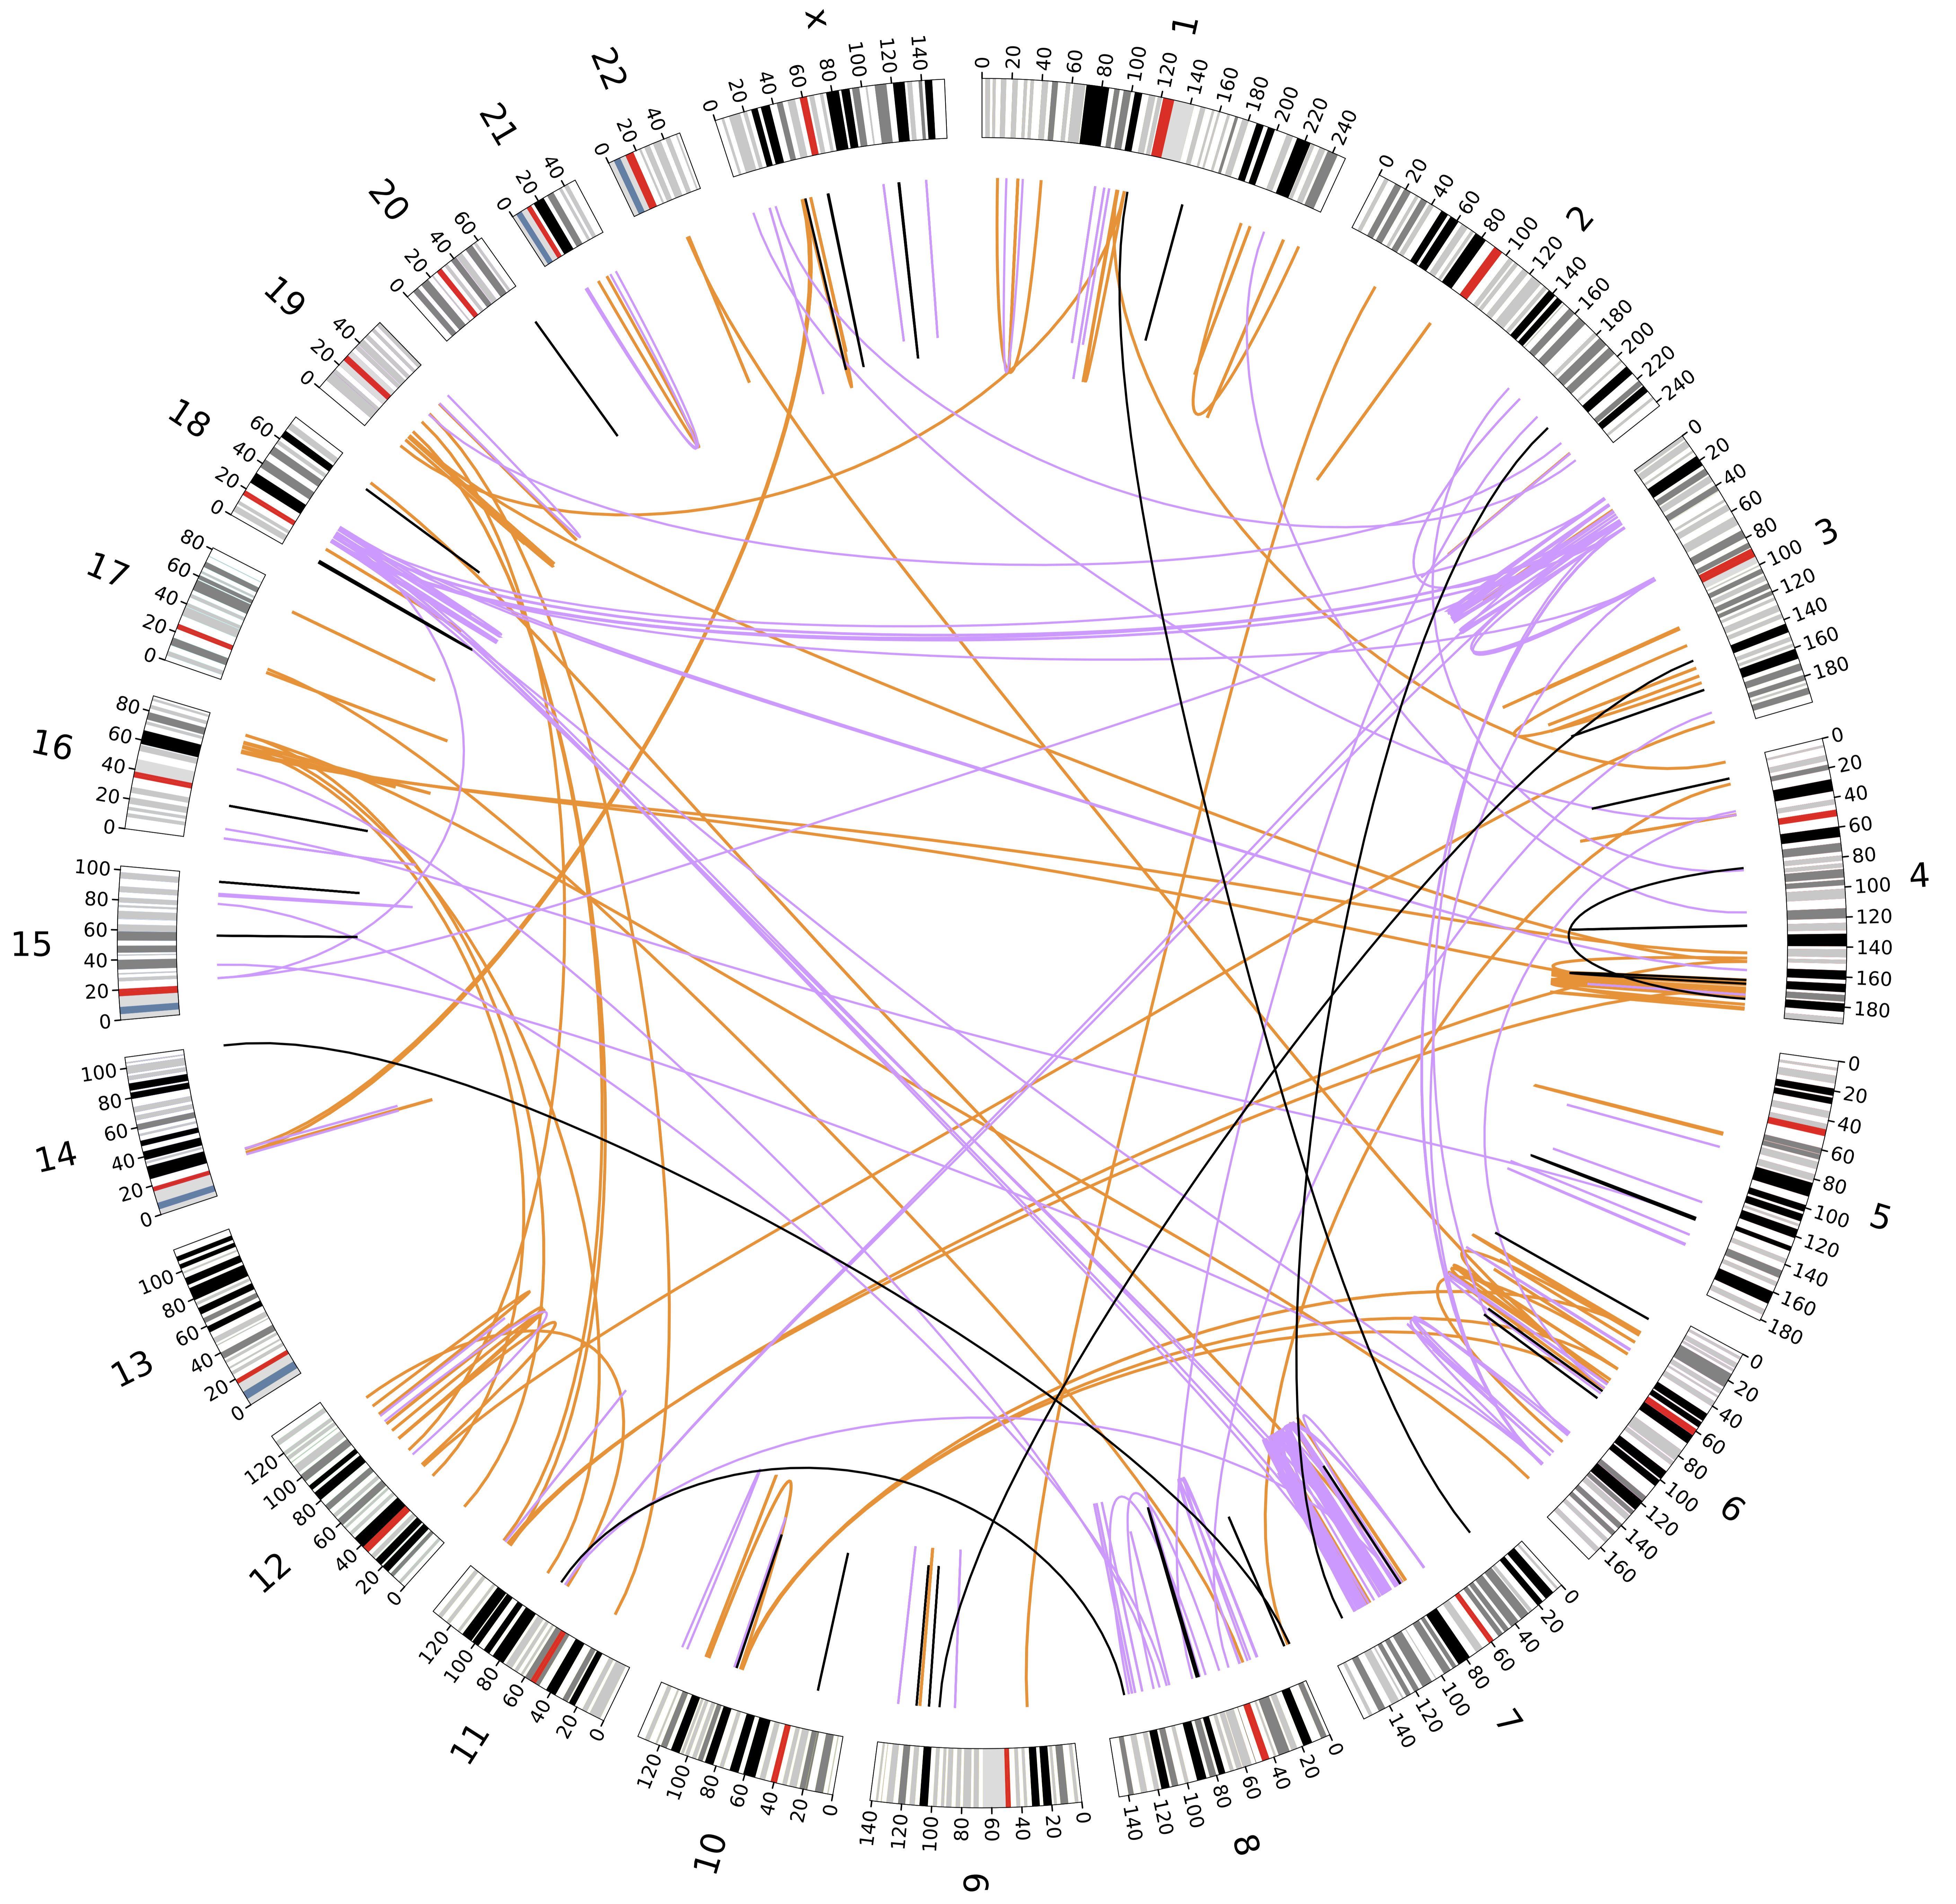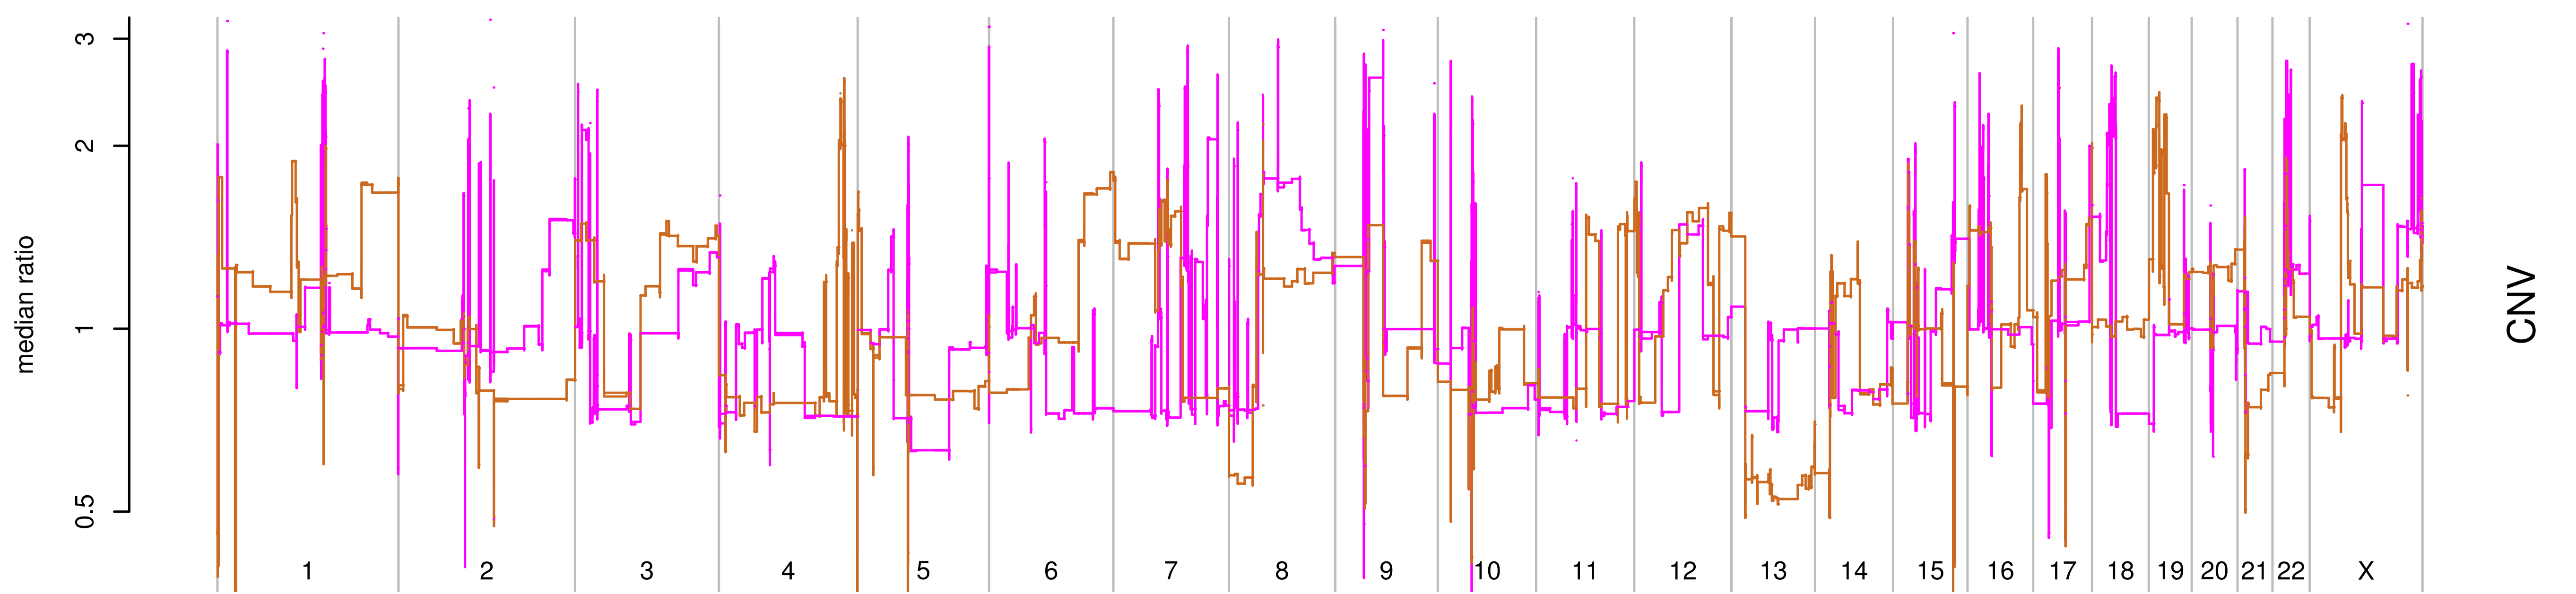



# P8

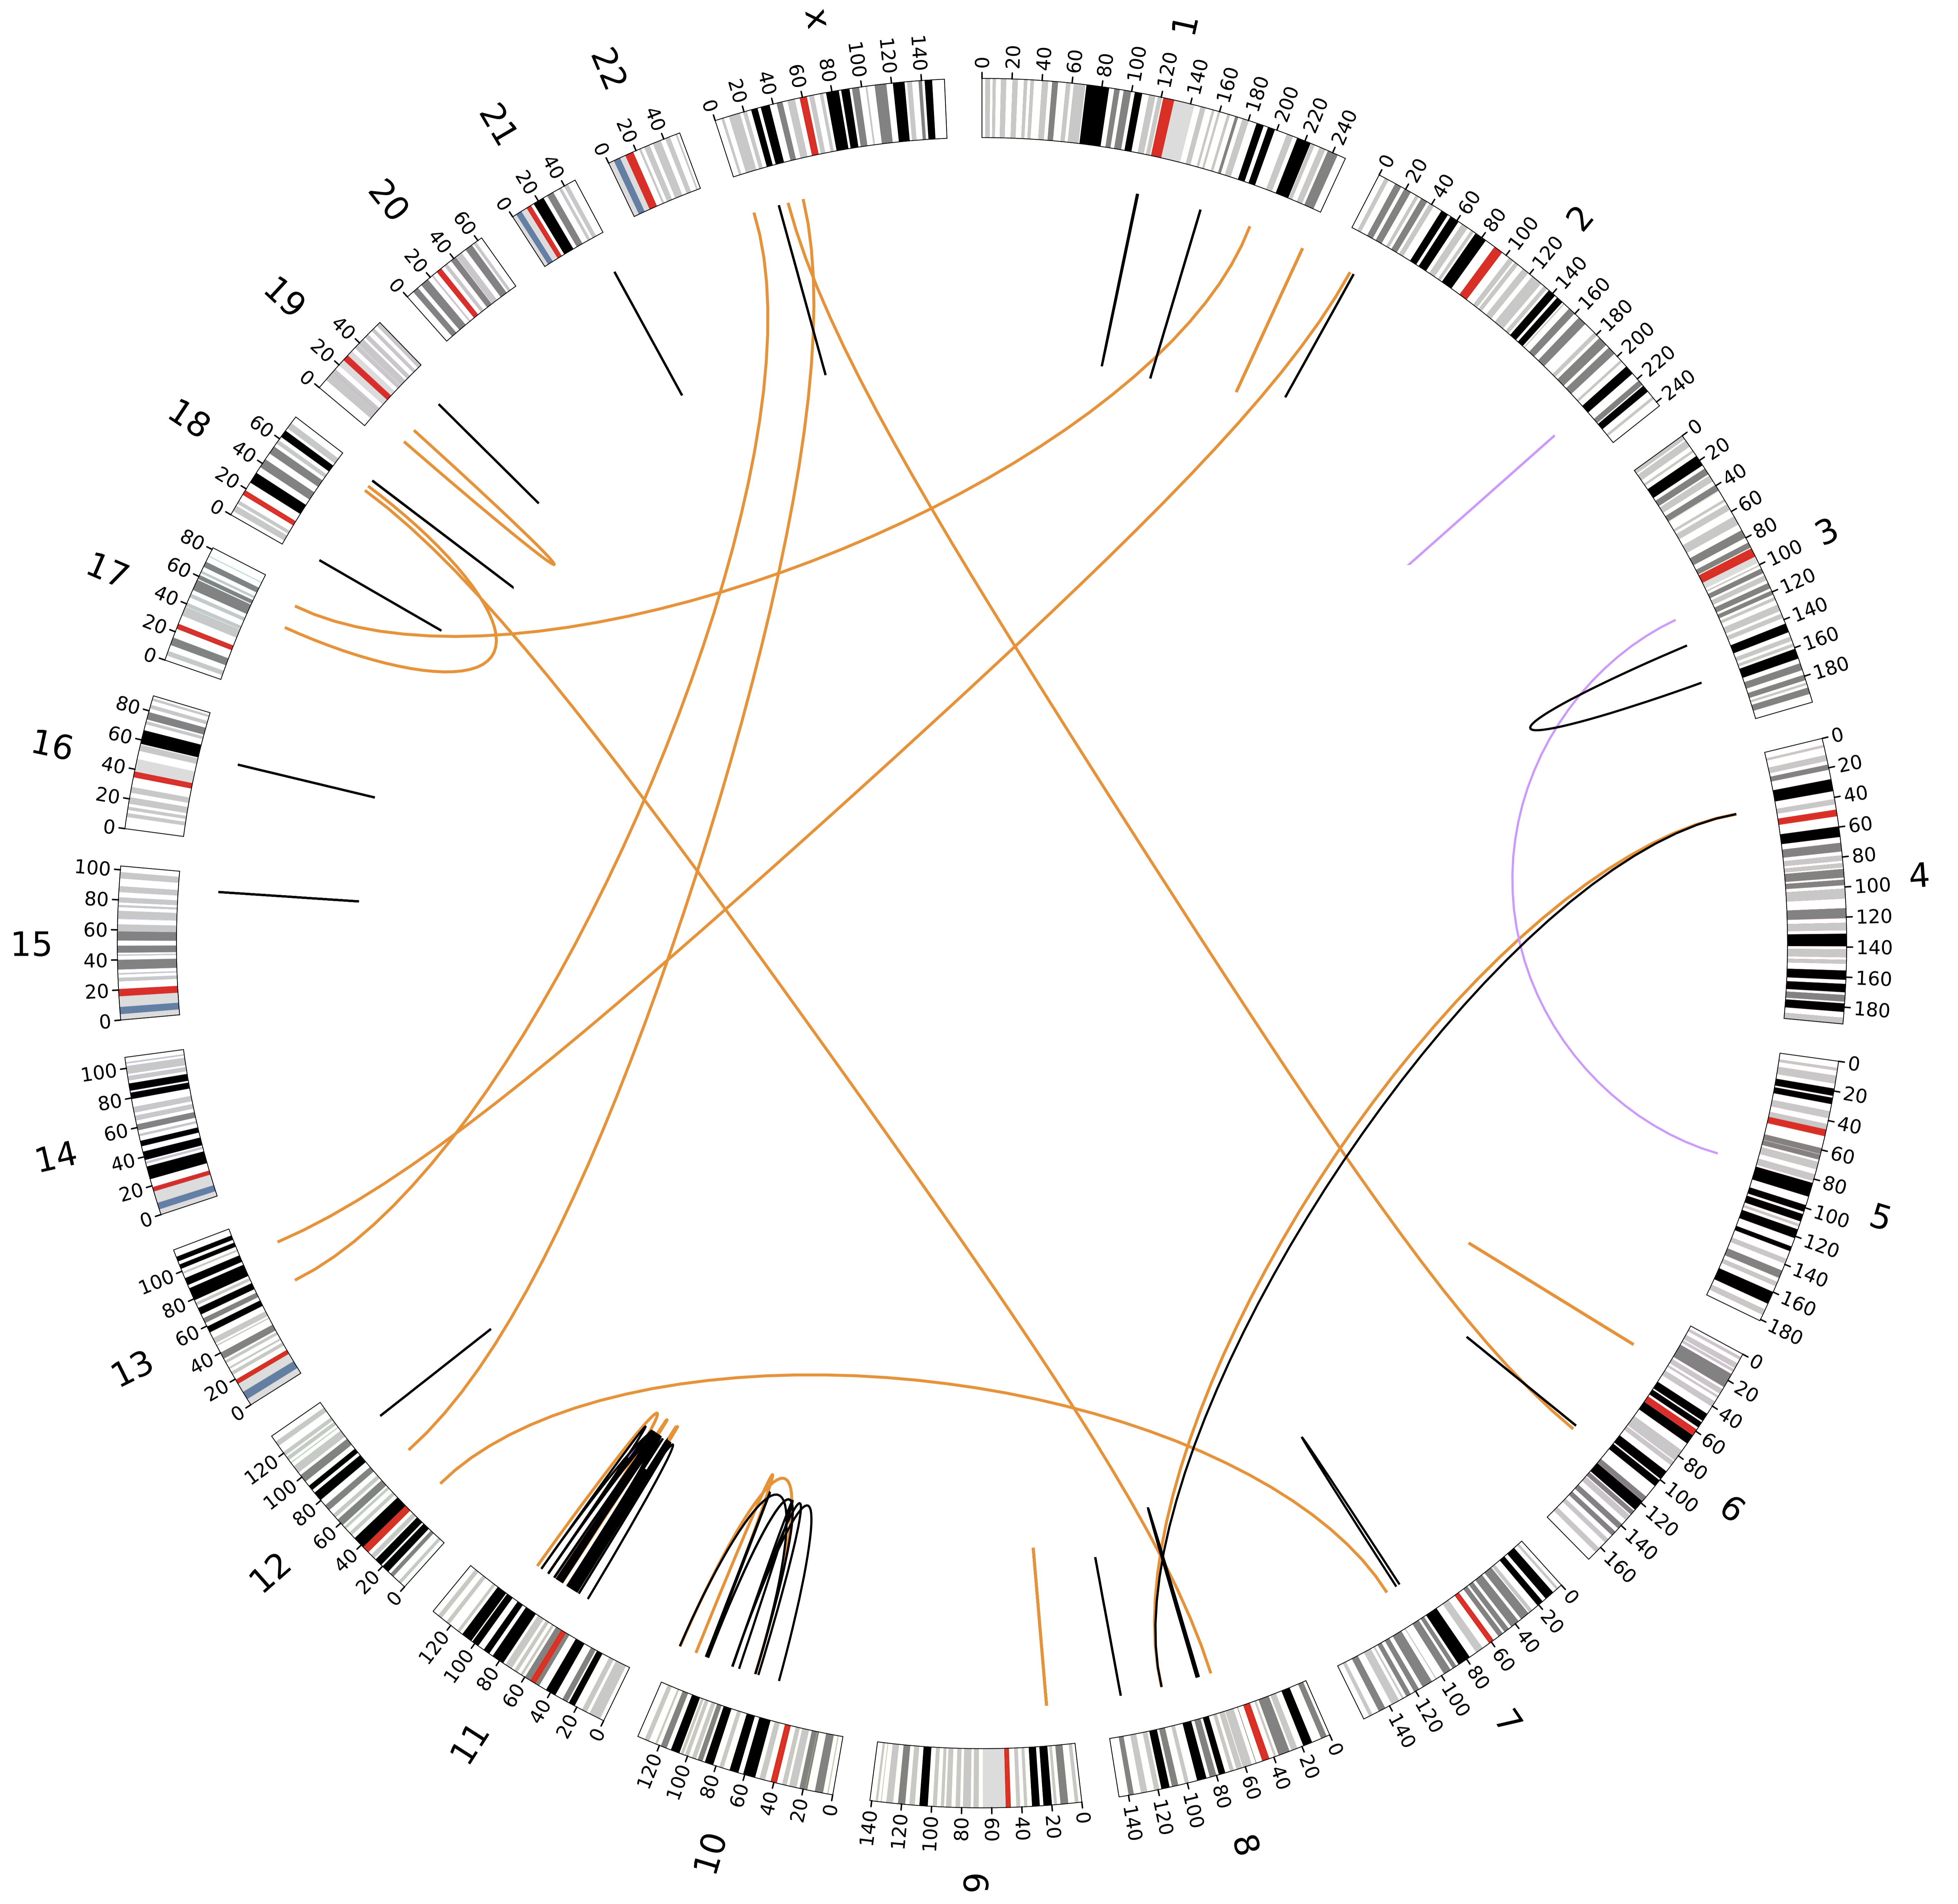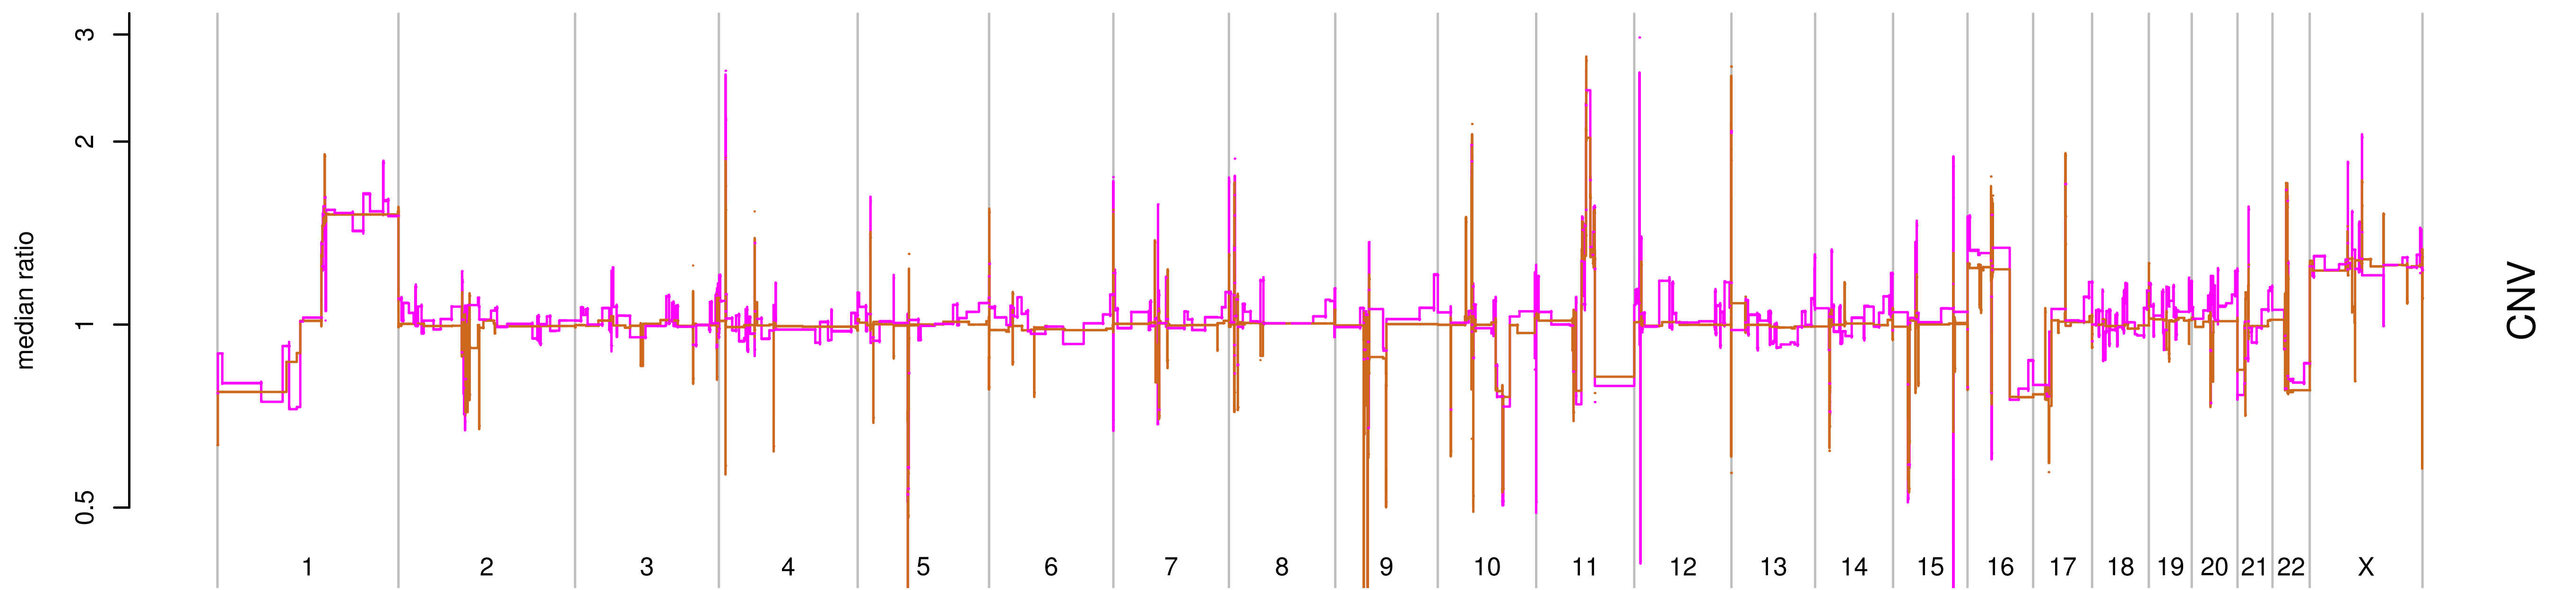



# P9

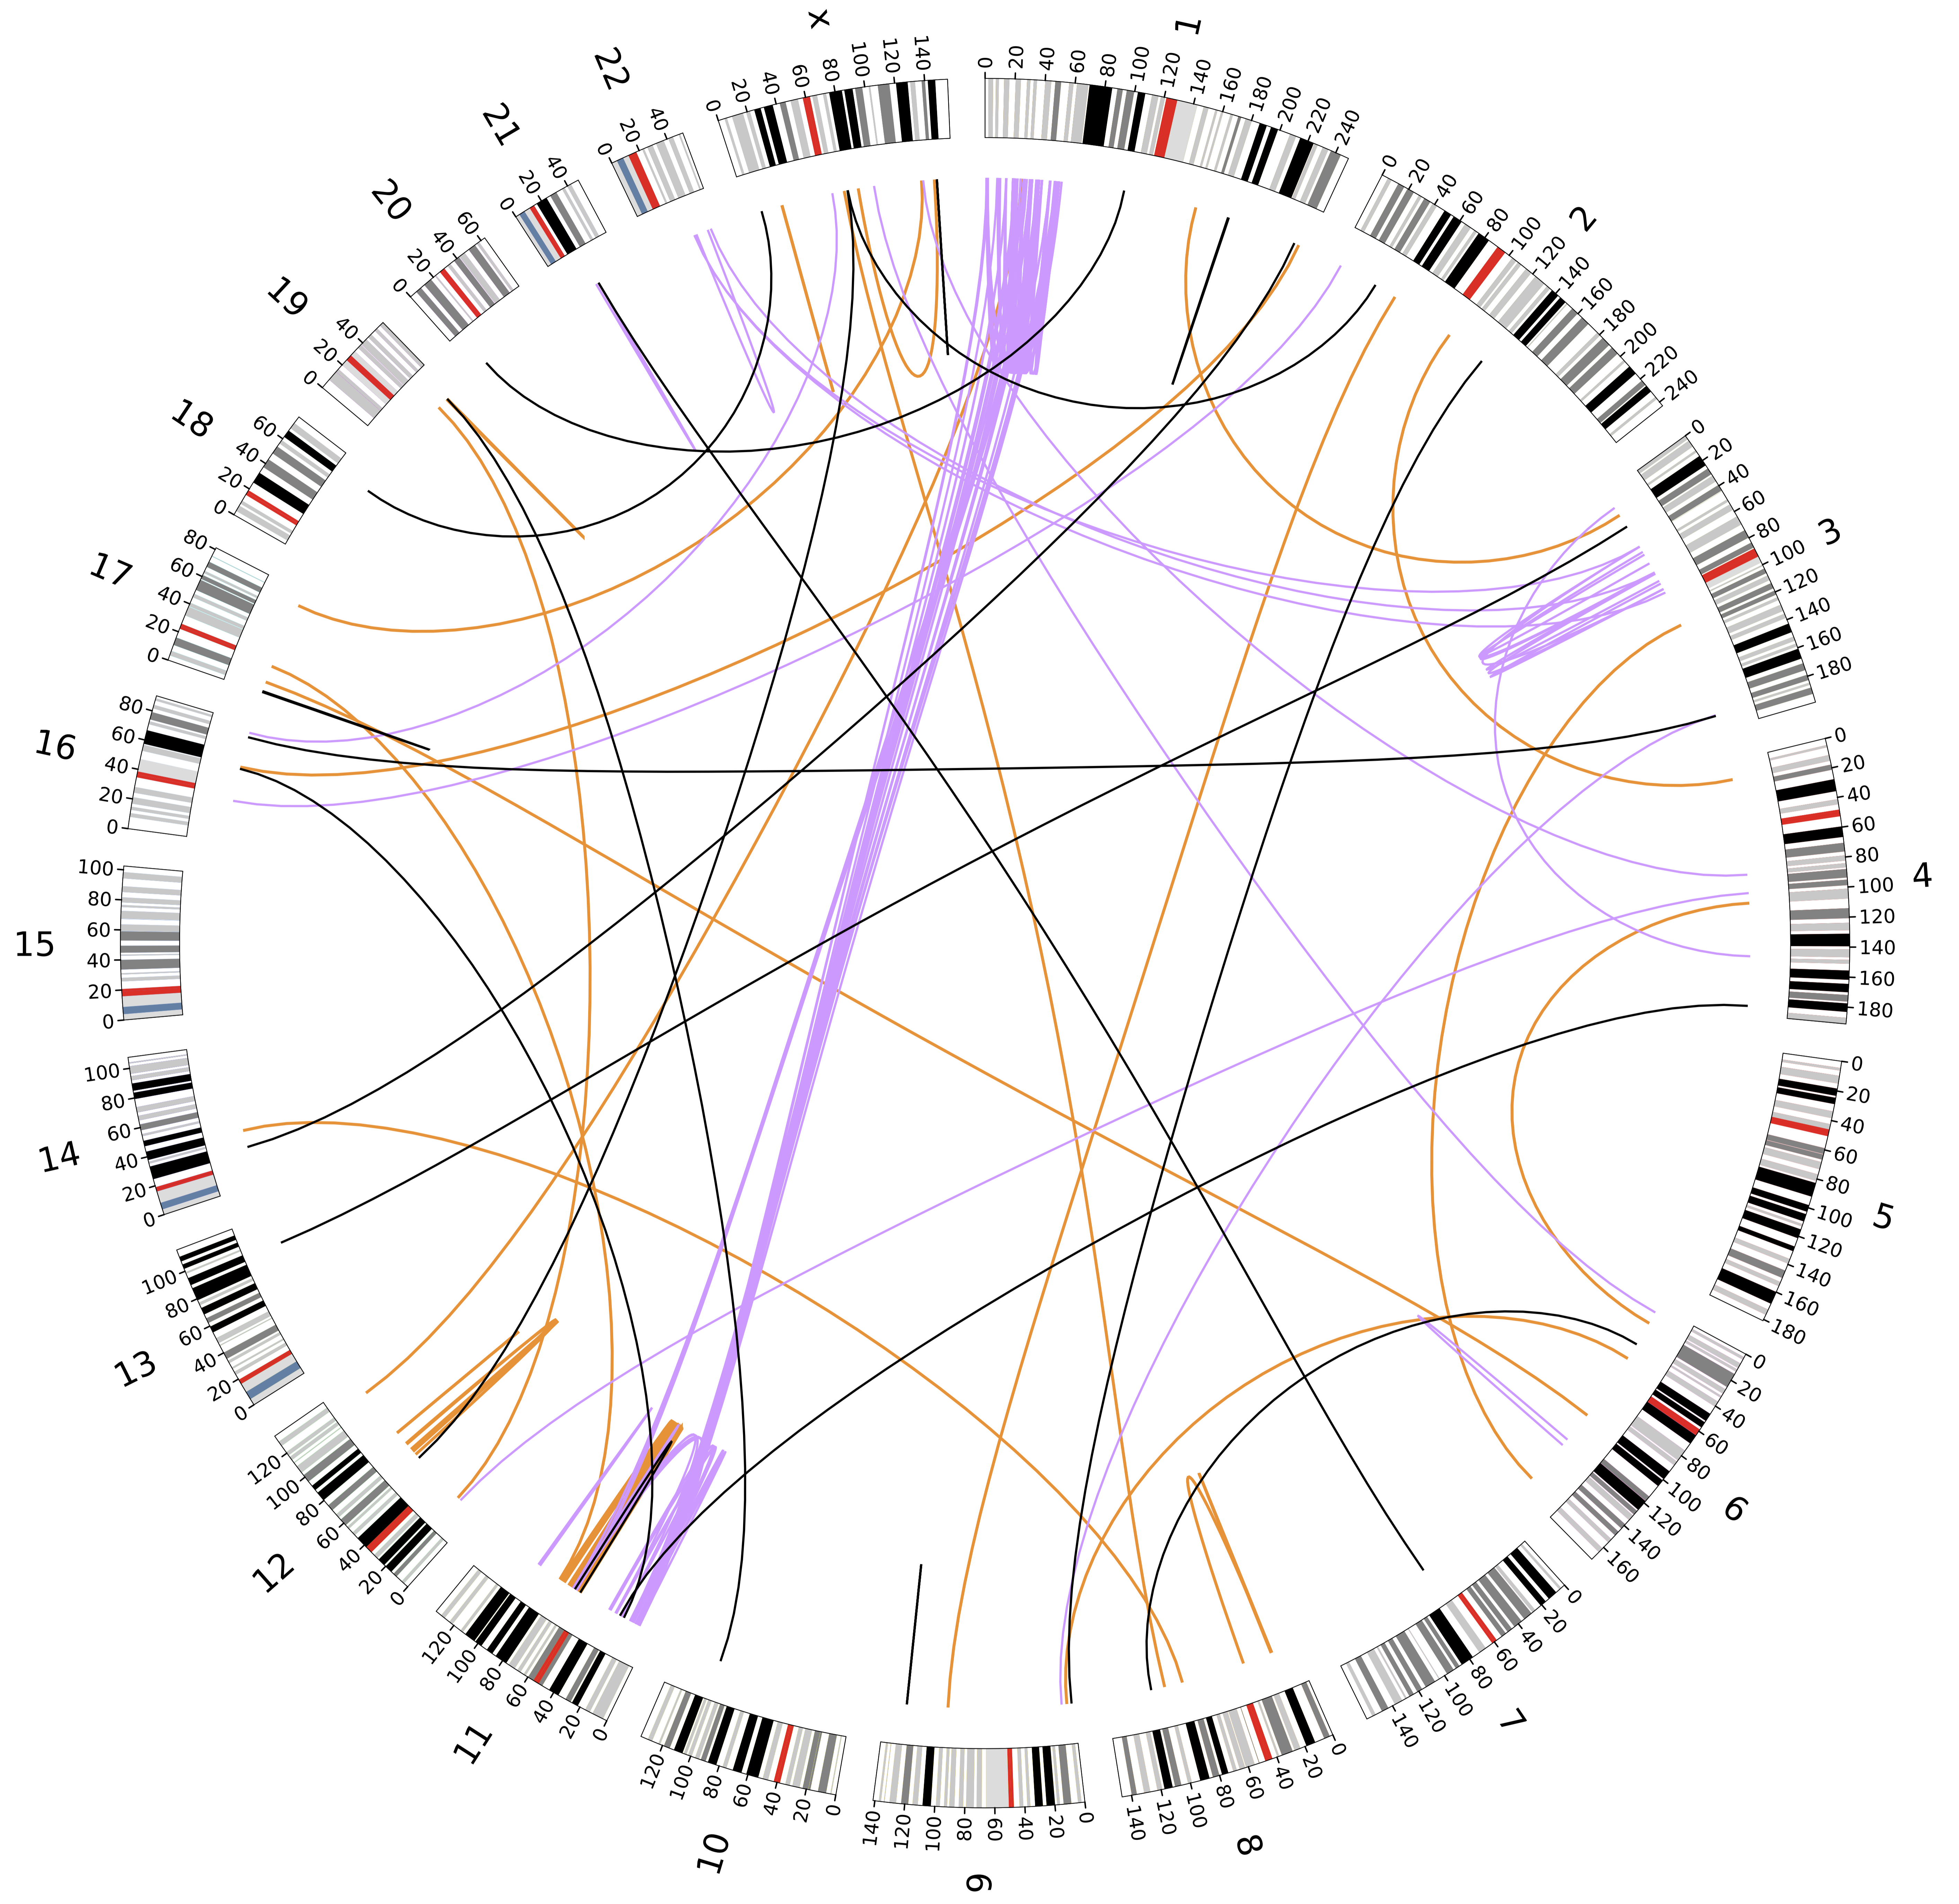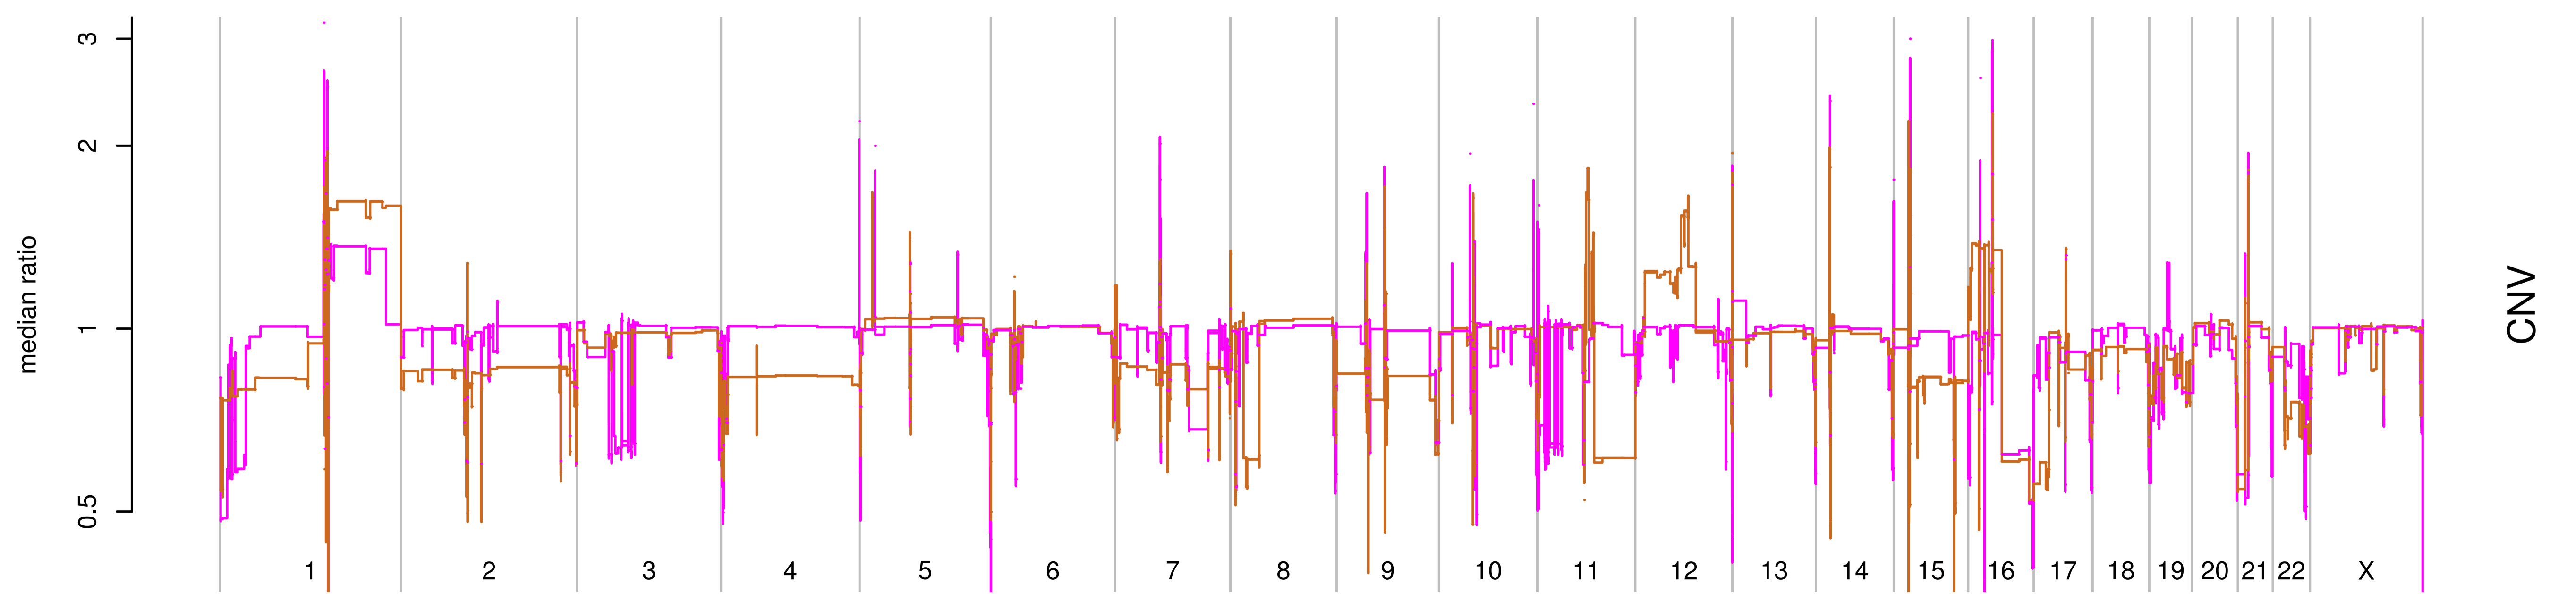



# P10

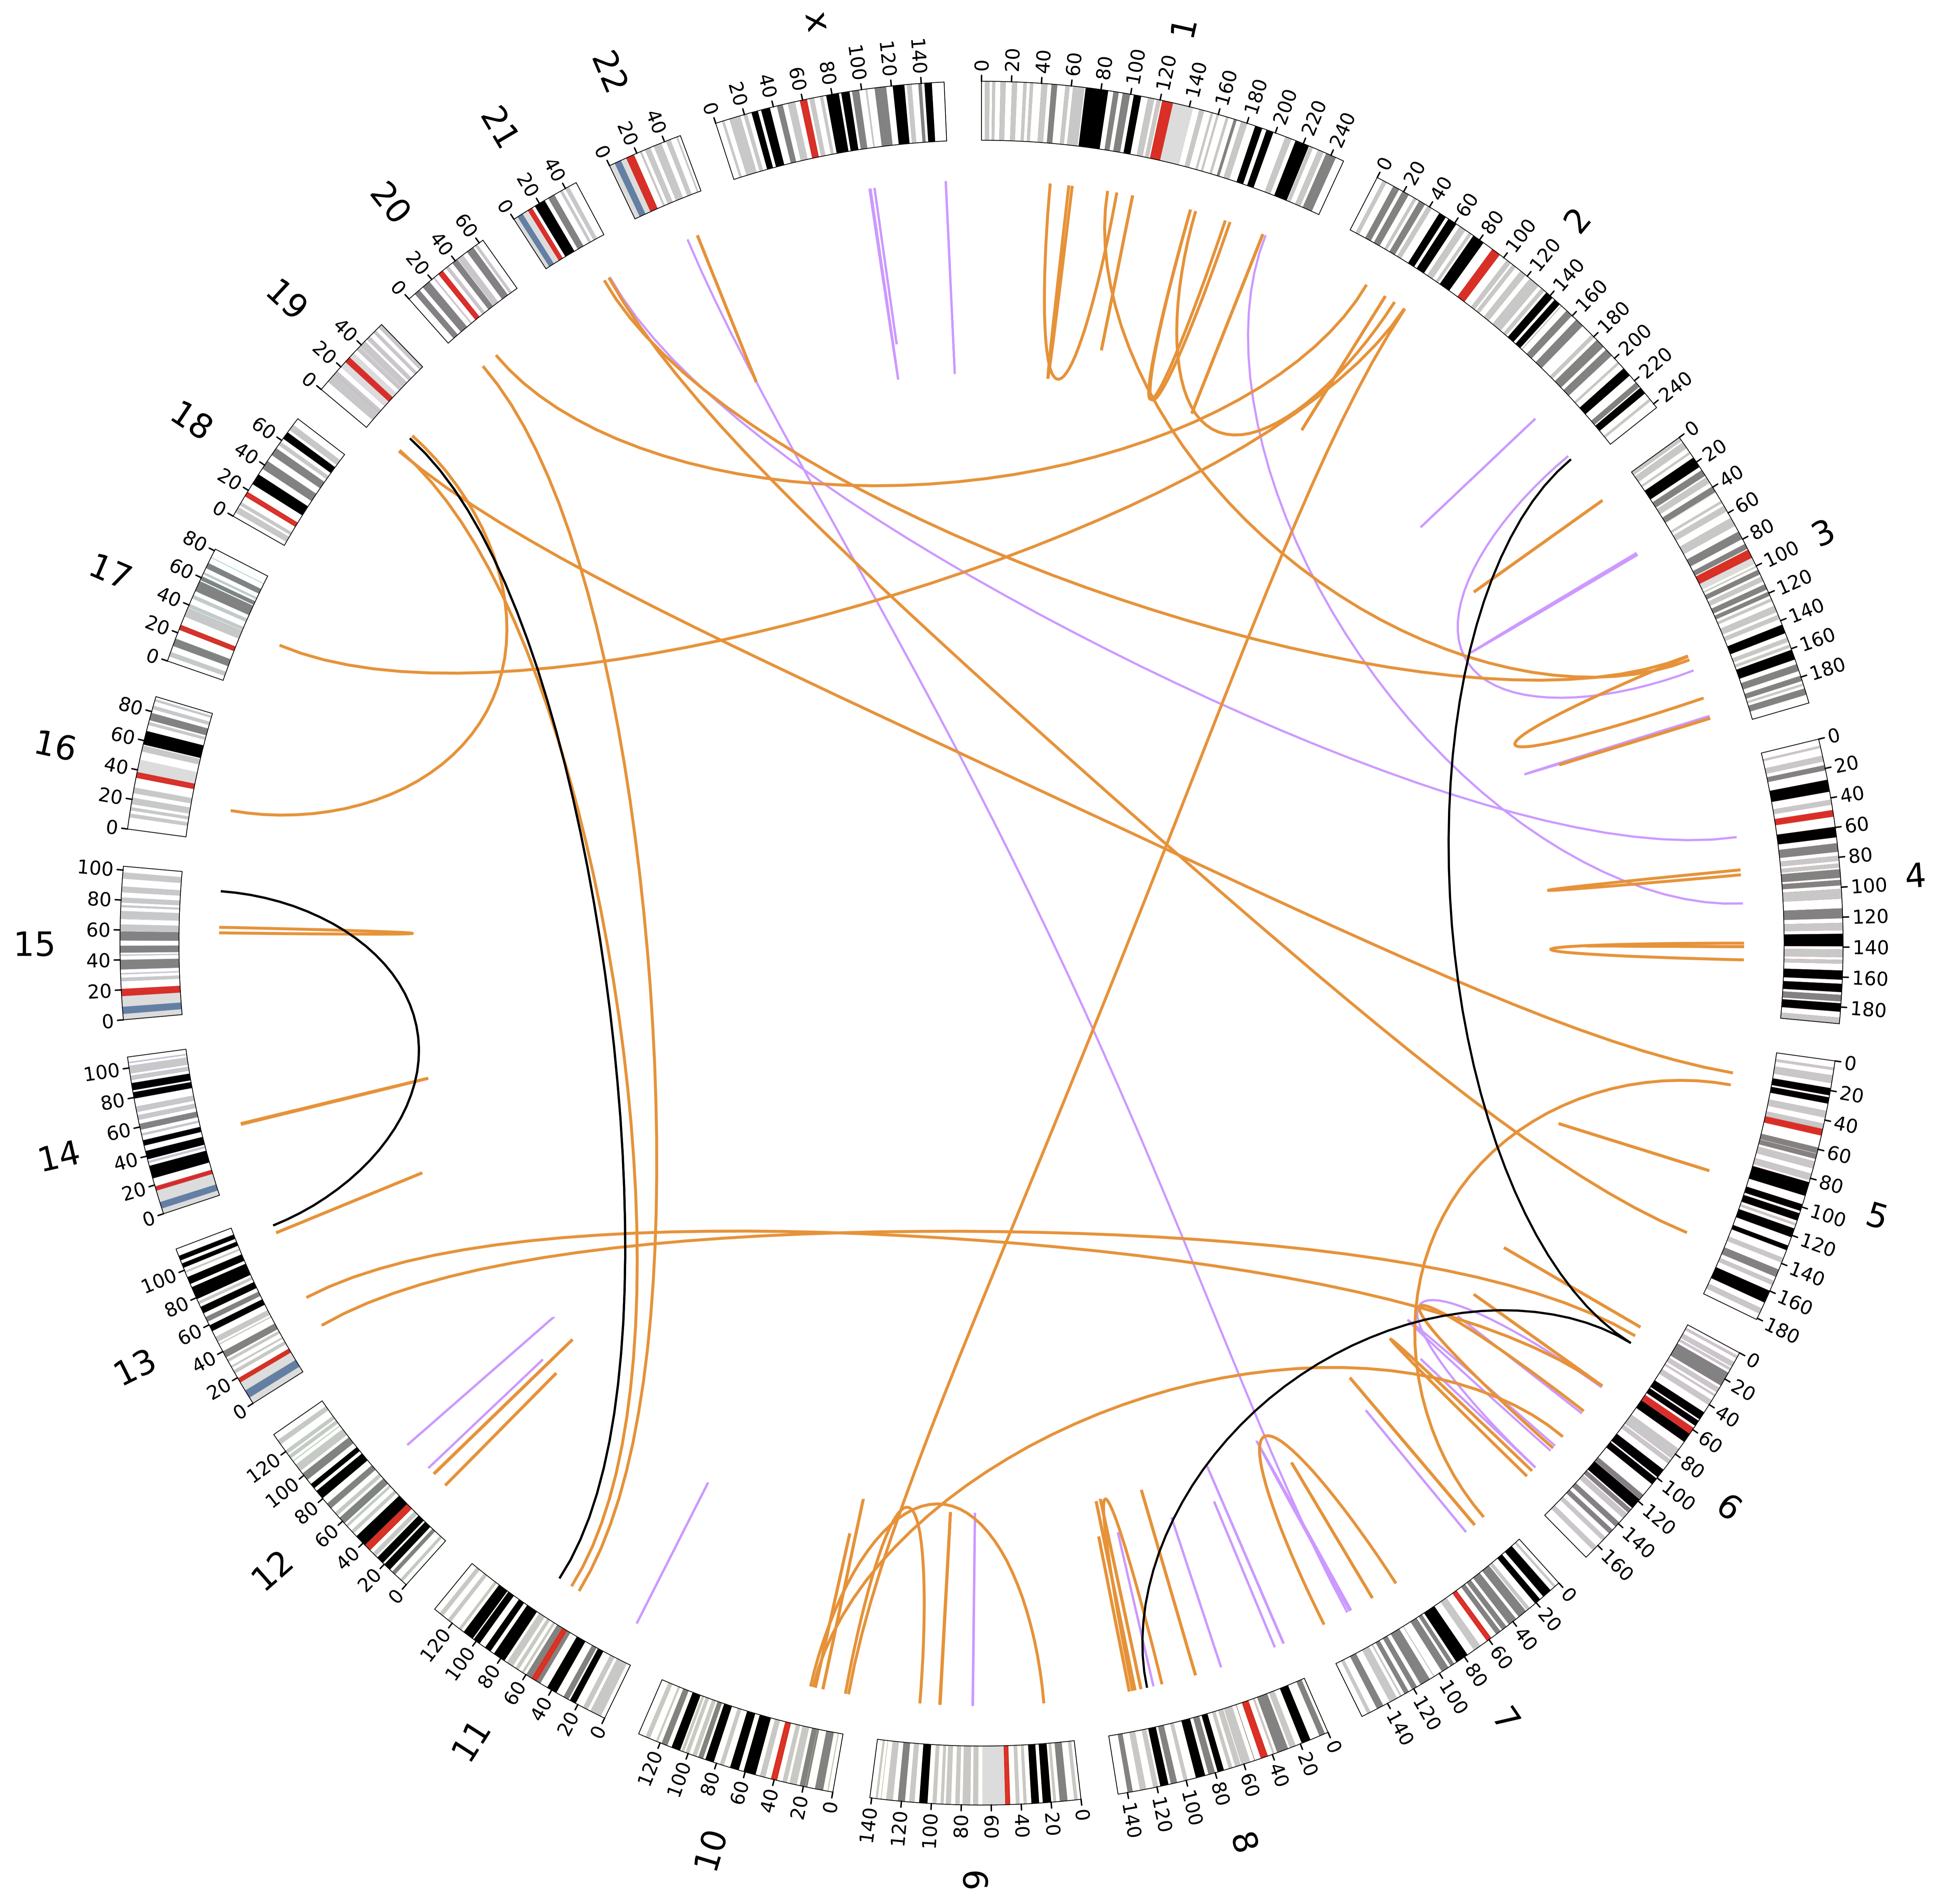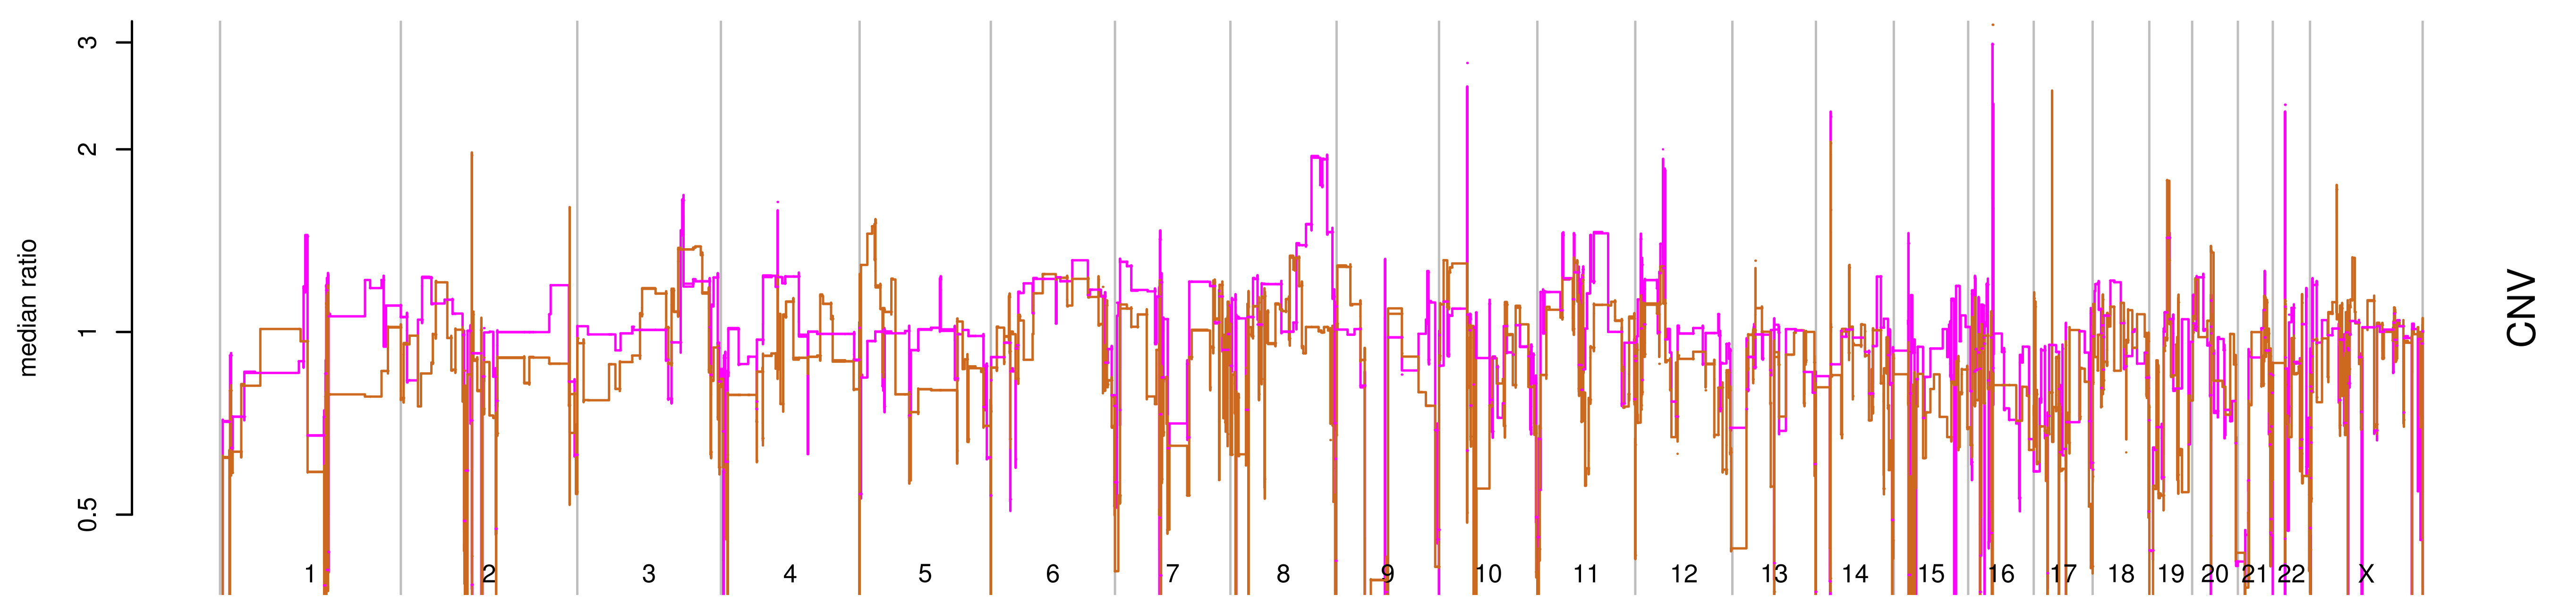

Supplement: MOESM3 [file 9781504]
